# Supplementary material for: Molecular design of benzothienobenzothiophene-cored columnar mesogens: facile synthesis, mesomorphism, and charge carrier mobility
Source: Royal Society of Chemistry journal article supplement (doi:10.1039/c7tc05315k), 2018-01-01
Supplement: c7tc05315k1.pdf [file c7tc05315k1.pdf]

## Supporting Information

### Molecular Design of Benzothienobenzothiophene-Cored Columnar Mesogens: Facile Synthesis, Mesomorphism, and Charge Carrier Mobility

Chun-Xia Liu,<sup>1</sup> Hu Wang,<sup>1</sup> Jun-Qi Du,<sup>1</sup> Ke-Qing Zhao\*,<sup>1</sup> Ping Hu,<sup>1</sup> Bi-Qin Wang,<sup>1</sup>  
Hirosato Monobe\*,<sup>2</sup> Benoit Heinrich,<sup>3</sup> Bertrand Donnio\*,<sup>3</sup>

1. College of Chemistry and Material sciences, Sichuan Normal University, Chengdu 610066, China. E-mail: kqzhao@sicnu.edu.cn
2. Inorganic Functional Materials Research Institute, National Institute of Advanced Industrial Science and Technology (AIST), Ikeda, Osaka 5638577, Japan. E-mail: monobe-hirosato@aist.go.jp
3. Institut de Physique et Chimie des Matériaux de Strasbourg (IPCMS), CNRS- Université de Strasbourg (UMR 7504), 23 rue du Loess, BP 43, 67034 Strasbourg Cedex 2 (France), E-mail: bertrand.donnio@ipcms.unistra.fr

| <b>Table of contents</b> |                                 |                 |
|--------------------------|---------------------------------|-----------------|
| <b>No.</b>               | <b>Contents</b>                 | <b>Page No.</b> |
| <b>1</b>                 | Experimental techniques         | 1               |
| <b>2</b>                 | Synthesis and Characterization  | 2-5             |
| <b>3</b>                 | POM photographs                 | 6-7             |
| <b>4</b>                 | DSC and TGA curves              | 8-11            |
| <b>5</b>                 | SAXS indexation and patterns    | 12-14           |
| <b>6</b>                 | TOF data and POM photos in cell | 15-16           |
| <b>7</b>                 | <sup>1</sup> H NMR spectra      | 17-26           |
| <b>8</b>                 | HRMS spectra                    | 26-28           |

## 1. Experimental techniques

**Elemental analysis.** EA were measured on a Vario Micro Select (Elementar company, German).

**NMR, MS, UV-Vis, PL.**  $^1\text{H}$  NMR was measured on a Varian INOVA 400 MHz spectrometer in  $\text{CDCl}_3$  using TMS as the internal standard. The high-resolution mass spectra (HRMS) were measured on a Fourier Transform ion cyclotron resonance mass spectrometer (7.0T FTICR-MS) instrument made by Ion Spec (Varian now) with MALDI or ESI as the ion source.

Ultraviolet-visible (UV-Vis) absorption spectra were measured at room temperature on a Perkin Elmer Lambda 950 spectrophotometer. Photoluminescence (PL) was measured on a HORIBA Fluoromax-4p, and the absolute quantum yields were measured by a HORIBA-F-3029 Integrating Sphere, HORIBA, Kyoto, Japan.

**POM, DSC and TGA.** The optical textures of liquid crystals were observed using a XP-201 and an Olympus BH2 Polarised Optical Microscope (POM) equipped with a XP-201 and Mettler FP82HT hot-stages of which temperatures were controlled by a XPR-201 and Mettler FP90. The phase transition temperatures and enthalpies were investigated using a TA-DSC Q100 differential scanning calorimeter (DSC) under  $\text{N}_2$  atmosphere with heating or cooling rate of  $5\text{-}10^\circ\text{C}/\text{min}$ . The thermal gravimetric analysis (TGA) was measured on a TA TGA-Q500 instrument with heating rate of  $20^\circ\text{C}/\text{min}$  in  $\text{N}_2$  atmosphere.

**SAXS.** Temperature-variation SAXS experiments were performed on a Rigaku Smartlab (3) X-Ray diffractometer equipped with a TCU 110 temperature control unit. The sample temperature was controlled within  $\pm 1$  K. The X-ray sources ( $\text{Cu K}\alpha$ ,  $\lambda = 0.154$  nm) were provided by 40 kW ceramic tubes.

**TOF mobility.** Electron and hole mobilities were measured by a TOF (time-of-flight) technique using a  $\text{N}_2$  gas laser (KEN-1520, Usho, 600 ps pulse width,  $\lambda = 337$  nm) and a hot stage. The cell with indium-tin-oxide (ITO) electrodes was mounted on a handmade hot stage, and electric bias was applied by dry cell batteries. Depending on the polarity of the applied electric field (20 to 50 kV/cm), positive or negative charge carriers were moving through the sample, causing displacement photocurrent, which was detected on a digital oscilloscope (DSO5052A, Agilent Technology) with a commercially available current amplifier (DHPCA-100, FEMTO). Thickness of the cell used for measurements was in range of  $15\text{-}20$   $\mu\text{m}$ . The cells were filled with the material in its isotropic liquid state by capillary forces, and then cooled down to the hexagonal columnar phase. POM images showed a low birefringent

textures with homeotropic domains, and the laser focused on a spot with homeotropic aligned sample area.

## 2. Synthesis and characterization

All solvents and chemical reagents are commercial products, and were used without further purification.

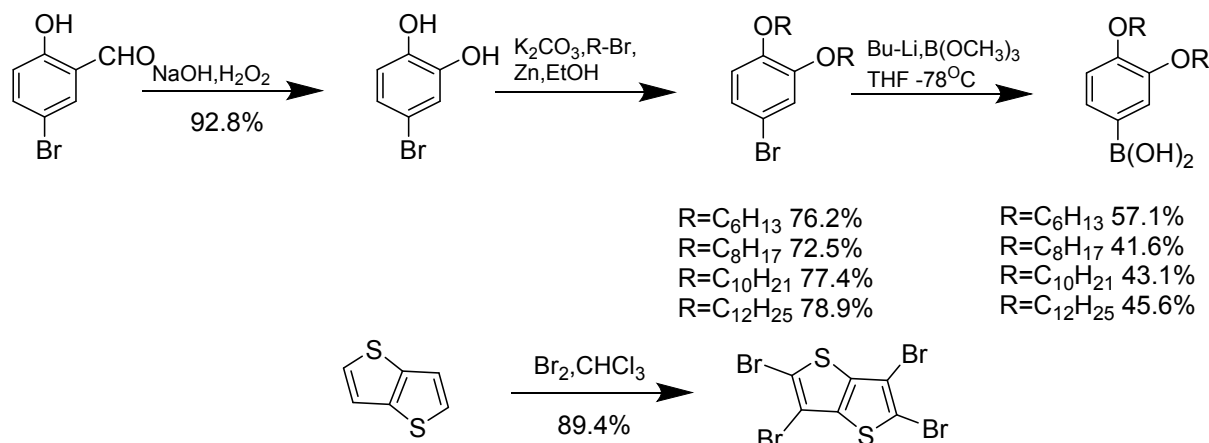

**Scheme S1.** Syntheses of the arylboronic acids and of tetrabromobithiophene.

The syntheses of the precursory arylboronic acids [1] (Scheme S1), tetrabromobithiophene [2] (Scheme S1), and 2-bromobiphenyl [3] (**1-1**, Scheme 1) were performed according to reported methods. The synthesis of the fused thieno[3,2-*b*]thiophene H-shaped liquid crystals (**M1-5**) and their precursors (**D2-5**), Scheme 1, is described below.

**1-2** (Suzuki coupling): Under argon atmosphere, 2-bromobiphenyl **1-1** (300 mg, 0.594 mmol) [3], thiophen[3,2-*b*]thiophene-2-boronic acid (99.4 mg, 0.54 mmol), K<sub>2</sub>CO<sub>3</sub> (1.12 g, 8.1 mmol), and Pd(PPh<sub>3</sub>)<sub>4</sub> (49.7 mg, 0.043 mmol) were added to a reaction tube. The degassed mixed solution of H<sub>2</sub>O (2 mL) and THF (10 mL) was injected, and the mixture heated to 80°C with stirring for 12 h. Once cooled, the mixture was extracted with CH<sub>2</sub>Cl<sub>2</sub> and dried with MgSO<sub>4</sub>, solvent was evaporated by vacuum, and the residue purified by silica gel column chromatography with elution of light petroleum/CH<sub>2</sub>Cl<sub>2</sub> 1:1 (vol) to yield the oil **1-2** (284 mg, 75 %). <sup>1</sup>H NMR (CDCl<sub>3</sub>, TMS, 400 MHz) δ: 7.25(d, *J* = 3.6 Hz, 1H, ArH), 7.13(d, *J* = 5.2 Hz, 1H, ArH), 7.06 (s, 1H, ArH), 6.90 (s, 1H, ArH), 6.85 (s, 1H, ArH), 6.81 (s 2H, ArH), 6.75 (s, 1H, ArH), 4.03~4.07 (m, 4H, OCH<sub>2</sub>), 3.98 (t, *J* = 6.8 Hz, 2H, OCH<sub>2</sub>), 3.72 (t, *J* = 6.8 Hz, 2H, OCH<sub>2</sub>), 1.80~1.87 (m, 6H, CH<sub>2</sub>), 1.58~1.63 (m, 2H, CH<sub>2</sub>), 1.37~1.49 (m, 12H, CH<sub>2</sub>), 1.24~1.30 (m, 4H, CH<sub>2</sub>), 0.85~0.95 (m, 12H, CH<sub>3</sub>).

**1-3** (cyclodehydrogenation reaction): To a stirred solution of **1-2** (270 mg, 0.424 mmol) in CH<sub>2</sub>Cl<sub>2</sub> (30 mL), FeCl<sub>3</sub> (138 mg, 0.848 mmol) in MeNO<sub>2</sub> (1.5 mL) was added and stirred at

[1] Zhang Q, Peng H, Zhang G, Lu Q, Chang J, Dong Y, Shi X, Wei J. *J. Am. Chem. Soc.*, 2014, 136, 5057-5064.

[2] Otsubo T, Kono Y, Hozo N, Miyamoto H, Aso Y, Ogura F, Tanaka T, Swada M. *Bull. Chem. Soc. Jpn.*, 1993, 66, 2033-2041.

[3] Zhao K Q, Du J Q, Long X H, Jing M, Wang B Q, Hu P, Monobe H, Henrich B, Donnio B. *Dyes Pigm.*, 2017, 143, 252-260.

room temperature for 1 h. Then, cold MeOH (3 mL) and water (3 mL) were added, and the product was extracted with CH<sub>2</sub>Cl<sub>2</sub>, dried with MgSO<sub>4</sub>, the organic solvent evaporated under reduced pressure, the residue purified by silica gel column with elution of light petroleum/CH<sub>2</sub>Cl<sub>2</sub> 1:1 (vol), and recrystallized in EtOAc/EtOH to yield the white crystalline solid **1-3** (217 mg, 81 %). <sup>1</sup>H NMR (CDCl<sub>3</sub>, TMS, 400 MHz): δ: 7.92 (s, 1H, ArH), 7.87 (s, 1H, ArH), 7.77 (s, 1H, ArH), 7.56 (d, *J* = 5.2 Hz, 1H, ArH), 7.46 (d, *J* = 5.2 Hz, 1H, ArH), 7.37 (s, 1H, ArH), 4.19~4.33 (m, 8H, OCH<sub>2</sub>), 1.93~2.04 (m, 8H, CH<sub>2</sub>), 1.42~1.64 (m, 16H, CH<sub>2</sub>), 0.96~1.00 (m, 12H, CH<sub>3</sub>).

**D2** (Suzuki cross-coupling). Under an argon atmosphere, to the mixture of tetrabromothieno[3,2-*b*]thiophene (100 mg, 0.22 mmol), (3,4-(hexyloxy)phenyl)boronic acid (424.2 mg, 1.3 mmol), K<sub>2</sub>CO<sub>3</sub> (1.2 g, 8.8 mmol), and Pd(PPh<sub>3</sub>)<sub>4</sub> (101.4 mg, 0.09 mmol), was injected H<sub>2</sub>O (5 mL) and THF (12 mL), and then was heated at 75°C for 36 h with stirring. Once cooled, the product was extracted with CH<sub>2</sub>Cl<sub>2</sub>, dried with MgSO<sub>4</sub>, the organic solvent evaporated under vacuum, the residue purified by silica column chromatography with elution of light petroleum/dichloromethane 3:1 (vol), recrystallized in methanol-ethanol to yield a pale yellow solid **D2** (254 mg, 92.9 %). <sup>1</sup>H NMR (CDCl<sub>3</sub>, TMS, 400 MHz) δ: 7.01 (d, *J* = 2.0 Hz, 1H, ArH), 6.99(d, *J* = 2.0 Hz, 1H, ArH), 6.98(d, *J* = 2.0 Hz, 2H, ArH), 6.91(d, 1H, *J* = 2.0 Hz, ArH), 6.89(d, *J* = 2.0 Hz, 1H, ArH), 6.87(s, 1H, ArH), 6.85(s, 3H, ArH), 6.78(s, 1H, ArH), 6.76(s, 1H, ArH), 3.95-4.02(m, 8H, OCH<sub>2</sub>), 3.84(t, *J* = 6.8 Hz, 4H, OCH<sub>2</sub>), 3.76(t, *J* = 6.8 Hz, 4H, OCH<sub>2</sub>), 1.81-1.85(m, 8H, CH<sub>2</sub>), 1.67-1.79(m, 8H, CH<sub>2</sub>), 1.43-1.48(m, 8H, CH<sub>2</sub>), 1.32-1.35(m, 24H, CH<sub>2</sub>), 1.28-1.34(m, 16H, CH<sub>2</sub>), 0.87-0.91(m, 24H, CH<sub>3</sub>).

**D3** to **D5** were synthesized according to the same procedure used for **D2**

**D3**: Tetrabromothieno[3,2-*b*]thiophene (100 mg, 0.22 mmol), (3,4-(octyloxy)phenyl)boronic acid (498.1 mg, 1.32 mmol), Pd(PPh<sub>3</sub>)<sub>4</sub> (101.4 mg, 0.09 mmol). **D3**: 243.8 mg, 75.6 %. <sup>1</sup>H NMR (CDCl<sub>3</sub>, TMS, 400 MHz) δ: 7.01(d, *J* = 2.0 Hz, 1H, ArH), 6.99(d, *J* = 2.0 Hz, 1H, ArH), 6.97(d, *J* = 2.0 Hz, 2H, ArH), 6.91(d, *J* = 2.0 Hz, 1H, ArH), 6.89(d, *J* = 2.0 Hz, 1H, ArH), 6.86(s, 1H, ArH), 6.84(s, 3H, ArH), 6.78(s, 1H, ArH), 6.76(s, 1H, ArH), 3.95-4.02(m, 8H, OCH<sub>2</sub>), 3.83(t, *J* = 6.8 Hz, 4H, OCH<sub>2</sub>), 3.76(t, *J* = 6.8 Hz, 4H, OCH<sub>2</sub>), 1.77-1.85(m, 8H, CH<sub>2</sub>), 1.67-1.74(m, 8H, CH<sub>2</sub>), 1.43-1.48(m, 8H, CH<sub>2</sub>), 1.28-1.37(m, 64H, CH<sub>2</sub>), 1.25-1.27(m, 8H, CH<sub>2</sub>), 0.87-0.89(m, 24H, CH<sub>3</sub>).

**D4**: Tetrabromothieno[3,2-*b*]thiophene (150 mg, 0.33 mmol), (3,4-(decyloxy)phenyl)boronic acid (857.8 mg, 1.97 mmol), Pd(PPh<sub>3</sub>)<sub>4</sub> (152.2 mg, 0.09 mmol). **D4**: 411 mg, 73.0 %. <sup>1</sup>H NMR (CDCl<sub>3</sub>, TMS, 400 MHz) δ: 7.01(d, *J* = 1.6 Hz, 1H, ArH), 6.99(s, 1H, ArH), 6.97(d, *J* = 2.0 Hz, 2H, ArH), 6.91(d, *J* = 2.0 Hz, 1H, ArH), 6.89(d, *J* = 1.6 Hz, 1H, ArH), 6.86(s, 1H, ArH), 6.84(d, *J* = 2.4 Hz, 3H, ArH), 6.78(s, 1H, ArH), 6.76(s, 1H, ArH), 3.95-4.02(m, 8H, OCH<sub>2</sub>), 3.83(t, *J* = 6.4 Hz, 4H, OCH<sub>2</sub>), 3.75(t, *J* = 6.4 Hz, 4H, OCH<sub>2</sub>), 1.79-1.85(m, 8H, CH<sub>2</sub>), 1.67-1.74(m, 8H, CH<sub>2</sub>), 1.45-1.48(m, 8H, CH<sub>2</sub>), 1.27-1.43(m, 104H, CH<sub>2</sub>), 0.86-0.88(m, 24H, CH<sub>3</sub>).

**D5**: Tetrabromothieno[3,2-*b*]thiophene (150 mg, 0.33 mmol), (3,4-(dodecyloxy)phenyl)boronic acid (967.6 mg, 1.97 mmol), Pd(PPh<sub>3</sub>)<sub>4</sub> (152.2 mg, 0.09 mmol). **D5**: 405 mg, 62.3 %. <sup>1</sup>H NMR (CDCl<sub>3</sub>, TMS, 400 MHz) δ: 7.01(d, *J* = 2.0 Hz, 1H, ArH), 6.99(d, *J* = 1.6 Hz, 1H, ArH), 6.97(d, *J* = 2.0 Hz, 2H, ArH), 6.91(d, *J* = 2.0 Hz, 1H, ArH), 6.89(d, *J* = 2.0 Hz, 1H, ArH), 6.86(s, 1H, ArH), 6.84(d, *J* = 2.0 Hz, 3H, ArH), 6.78(s, 1H, ArH), 6.76(s, 1H, ArH), 3.95-4.02(m, 8H, OCH<sub>2</sub>), 3.83(t, *J* = 6.8 Hz, 4H, OCH<sub>2</sub>), 3.75(t, *J* = 6.8 Hz, 4H,

OCH<sub>2</sub>), 1.81-1.86(m, 10H, CH<sub>2</sub>), 1.68-1.76(m, 6H, CH<sub>2</sub>), 1.43-1.46(m, 10H, CH<sub>2</sub>), 1.26-1.36(m, 132H, CH<sub>2</sub>), 0.88(t, *J* = 4.8 Hz, 24H, CH<sub>3</sub>).

**M1** was synthesized by intermolecular cyclodehydrogenation (cross oxidation). To a solution of **1-3** (78 mg, 0.157 mmol) and 3,3',4,4'-tetra(pentyloxy)-1,1-biphenyl (100 mg, 0.157 mmol) in CHCl<sub>3</sub> (25 mL), were added with stirring FeCl<sub>3</sub> (102.6 mg, 0.63 mmol) in MeNO<sub>2</sub> (1 mL). After 1 h, cold MeOH (2 mL) and H<sub>2</sub>O (2 mL) were added. It was extracted by CHCl<sub>3</sub>, dried with MgSO<sub>4</sub>, organic solvent evaporated under vacuum, the residue purified by silica column with elution of light petroleum/ethyl acetate/CHCl<sub>3</sub> 10:20:0.3 (vol), and recrystallized from EtOAc-EtOH to get a white solid **M1** (80 mg, 45 %). <sup>1</sup>H NMR (CDCl<sub>3</sub>, TMS, 400 MHz) δ: 8.07 (s, 2H, ArH), 8.00 (s, 2H, ArH), 7.95 (s, 2H, ArH), 7.48 (s, 2H, ArH), 4.31 (t, *J* = 6.4 Hz, 4H, CH<sub>2</sub>), 4.11~4.18 (m, 8H, CH<sub>2</sub>), 3.99 (t, *J* = 6.0 Hz, 2H, OCH<sub>2</sub>), 1.87~1.97 (m, 16H, CH<sub>2</sub>), 1.39~1.61 (m, 32H, CH<sub>2</sub>), 0.95~1.04 (m, 24H, CH<sub>3</sub>). HRMS *m/z* (100%) (ESI): [M]<sup>+</sup> Calcd for C<sub>70</sub>H<sub>96</sub>O<sub>8</sub>S<sub>2</sub> 1128.6545, Found: 1128.6545. Elemental analysis: Calcd for C<sub>70</sub>H<sub>96</sub>O<sub>8</sub>S<sub>2</sub>: C, 74.43%; H, 8.57%; S, 5.68%. Found: C, 74.27%; H, 8.38%; S, 5.34%.

**M2** was synthesized by intramolecular cyclodehydrogenation. To a stirred solution of **D2** (200 mg, 0.16 mmol) in CH<sub>2</sub>Cl<sub>2</sub> (40 mL), were added FeCl<sub>3</sub> (156.2 mg, 0.96 mmol) in MeNO<sub>2</sub> (3.0 mL). After 2 h stirring, solids were deposited. Cold MeOH and water were added, solid was filtrated, washed 3 times with water and methanol. The filtrate was recrystallized in toluene-light petroleum to yield a pale solid **M2** (199.3 mg, 82.5%). <sup>1</sup>H NMR (CDCl<sub>3</sub>, TMS, 400 MHz) δ: 7.95-7.97(m, 6H, ArH), 7.51-7.56(m, 2H, ArH), 4.43(t, *J* = 6.4 Hz, 4H, OCH<sub>2</sub>), 4.30(t, *J* = 6.0 Hz, 12H, OCH<sub>2</sub>), 2.03-2.09(m, 4H, CH<sub>2</sub>), 1.96-2.02(m, 12H, CH<sub>2</sub>), 1.68-1.73(m, 12H, CH<sub>2</sub>), 1.44-1.49(m, 32H, CH<sub>2</sub>), 0.95-0.99(m, 24H, CH<sub>3</sub>). HRMS *m/z* (100%) (ESI): [M]<sup>+</sup> calcd for C<sub>78</sub>H<sub>112</sub>O<sub>8</sub>S<sub>2</sub> 1240.7799, found 1240.7795. Elemental analysis: Calcd for C<sub>78</sub>H<sub>112</sub>O<sub>8</sub>S<sub>2</sub>: C, 75.44%; H, 9.09%; S, 5.16%. Found: C, 74.28%; H, 8.87%; S, 4.95%.

**M3 - M5** were synthesized according to the same procedure used for **M2**.

**M3: D3** (100 mg, 0.07 mmol), FeCl<sub>3</sub> (66.2 mg, 0.41mmol). **M3**: 74.5mg, 74.7%. <sup>1</sup>H NMR (CDCl<sub>3</sub>, TMS, 400 MHz) δ: 8.02(s, 2H, ArH), 7.96(s, 2H, ArH), 7.91 (s, 2H, ArH), 7.53(s, 2H, ArH), 4.44(t, *J* = 6.4 Hz, 4H, OCH<sub>2</sub>), 4.30(t, *J* = 6.4 Hz, 12H, OCH<sub>2</sub>), 2.04-2.10(m, 4H, CH<sub>2</sub>), 1.96-2.03(m, 12H, CH<sub>2</sub>), 1.68-1.71(m, 4H, CH<sub>2</sub>), 1.61-1.69(m, 12H, CH<sub>2</sub>), 1.45-1.49(m, 32H, CH<sub>2</sub>), 1.27-1.44(m, 32H, CH<sub>2</sub>), 0.88-0.94(m, 24H, CH<sub>3</sub>). HRMS *m/z* (100%) (ESI): [M]<sup>+</sup> calcd for C<sub>94</sub>H<sub>144</sub>O<sub>8</sub>S<sub>2</sub> 1466.0336, found 1466.0331. Elemental analysis: Calcd for C<sub>94</sub>H<sub>144</sub>O<sub>8</sub>S<sub>2</sub>: C, 77.00%; H, 9.90%; S, 4.37%. Found: C, 77.13%; H, 9.92%; S, 3.98%.

**M4: D4** (360 mg, 0.21 mmol), FeCl<sub>3</sub> (204.7 mg, 1.26 mmol). **M4**: 256 mg, 71.3%. <sup>1</sup>H NMR(CDCl<sub>3</sub>, TMS, 400 MHz), δ: 8.00(s, 2H, ArH), 7.96(s, 2H, ArH), 7.91 (s, 2H, ArH), 7.53(s, 2H, ArH), 4.44(t, *J* = 6.8 Hz, 4H, OCH<sub>2</sub>), 4.29(t, *J* = 6.8 Hz, 12H, OCH<sub>2</sub>), 2.05-2.11(m, 4H, CH<sub>2</sub>), 1.97-2.04(m, 12H, CH<sub>2</sub>), 1.67-1.71(m, 4H, CH<sub>2</sub>), 1.60-1.62(m, 12H, CH<sub>2</sub>), 1.49-1.50(m, 24H, CH<sub>2</sub>), 1.27-1.37(m, 72H, CH<sub>2</sub>), 0.87-0.91(m, 24H, CH<sub>3</sub>). HRMS *m/z* (100%) (ESI): [M]<sup>+</sup> calcd for C<sub>110</sub>H<sub>176</sub>O<sub>8</sub>S<sub>2</sub> 1690.2840, found 1690.2839. Elemental analysis: Calcd for C<sub>110</sub>H<sub>176</sub>O<sub>8</sub>S<sub>2</sub>: C, 78.14%; H, 10.49%; S, 3.79%. Found: C, 78.12%; H, 10.24%; S, 3.66%.

**M5: D5** (150 mg, 0.08 mmol), FeCl<sub>3</sub> (73.8 mg, 0.45 mmol). **M5**: 125.6 mg, 83.9%. <sup>1</sup>H NMR (CDCl<sub>3</sub>, TMS, 400 MHz) δ: 7.92-7.94(m, 6H, ArH), 7.49-7.51(m, 2H, ArH), 4.34-4.45(m, 4H, OCH<sub>2</sub>), 4.22-4.34(m, 12H, OCH<sub>2</sub>), 2.07-2.11(m, 6H, CH<sub>2</sub>), 1.99-2.01(m,12H,CH<sub>2</sub>),1.44-1.48(m,18H, CH<sub>2</sub>), 1.60-1.62(m, 12H, CH<sub>2</sub>), 1.49-1.50(m, 24H, CH<sub>2</sub>), 1.27-1.37(m, 72H, CH<sub>2</sub>),

0.87-0.91(m, 24H, CH<sub>3</sub>). HRMS m/z (100%) (ESI): [M+H]<sup>+</sup> calcd for C<sub>126</sub>H<sub>208</sub>O<sub>8</sub>S<sub>2</sub> 1914.5344, found 1915.5406. Elemental analysis: Calcd for C<sub>126</sub>H<sub>208</sub>O<sub>8</sub>S<sub>2</sub>: C, 79.02%; H, 10.95%; S, 3.35%. Found: C, 79.11%; H, 10.83%; S, 3.38%.

### 3. POM pictures

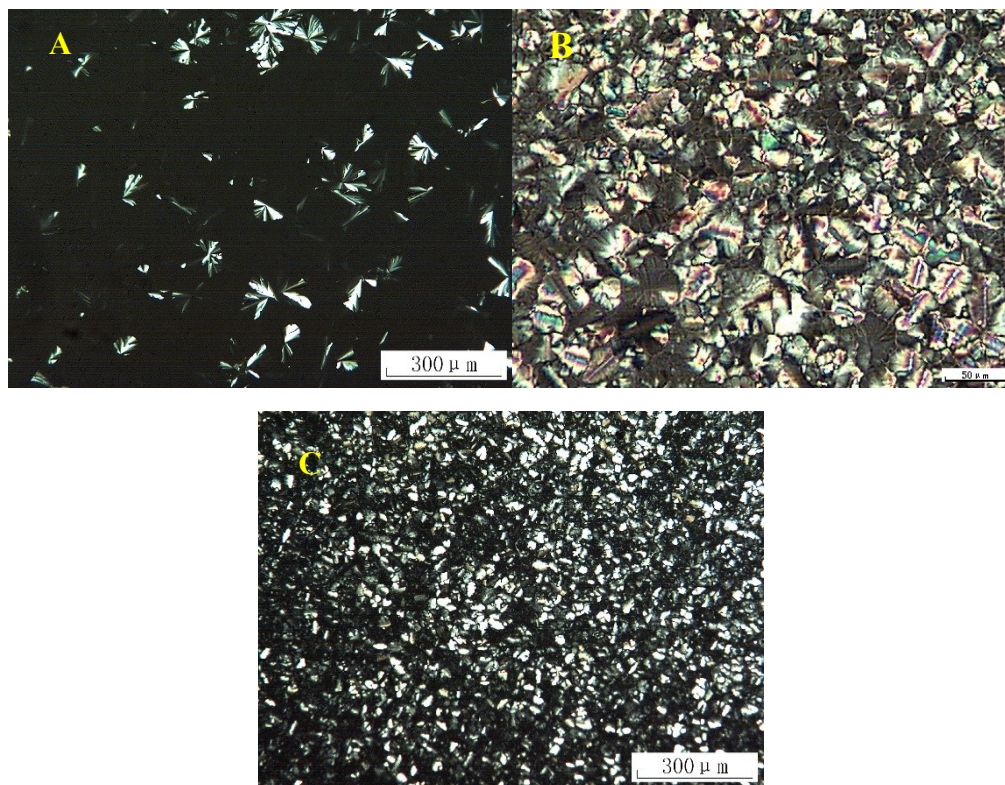

**Figure S1.** POM of intermediate tetraarylbitiophenes in pseudo crystalline phases. A: **D3** at 66°C; B: **D4** at 45°C; C: **D5** at 32°C (see text).

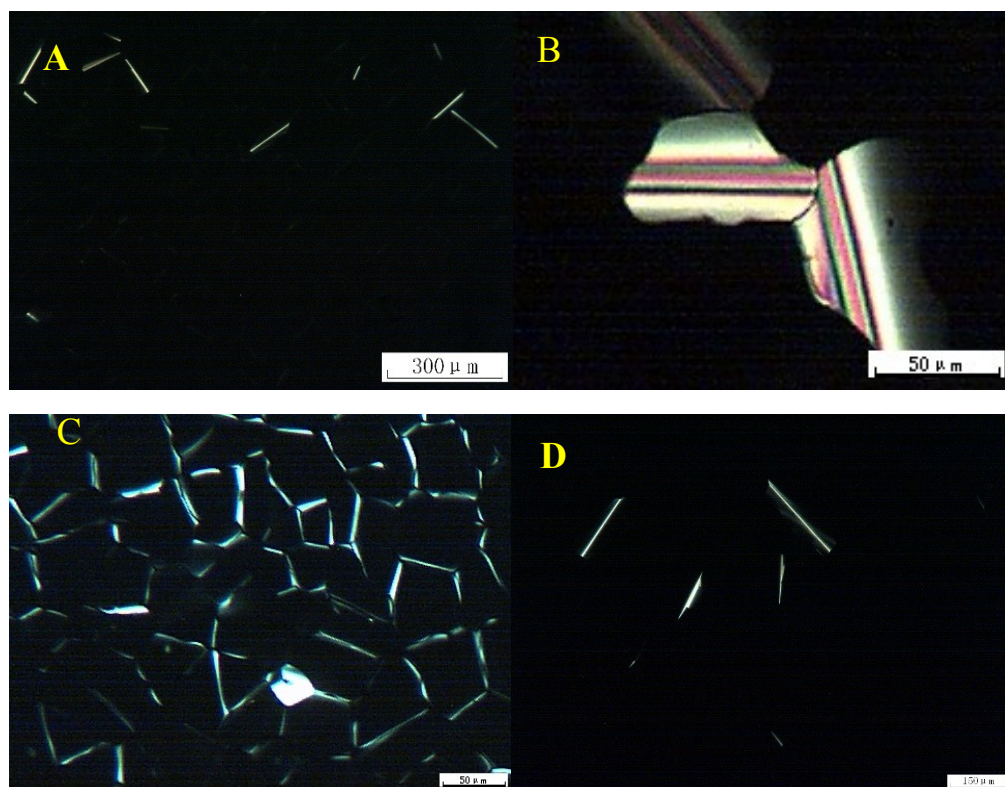



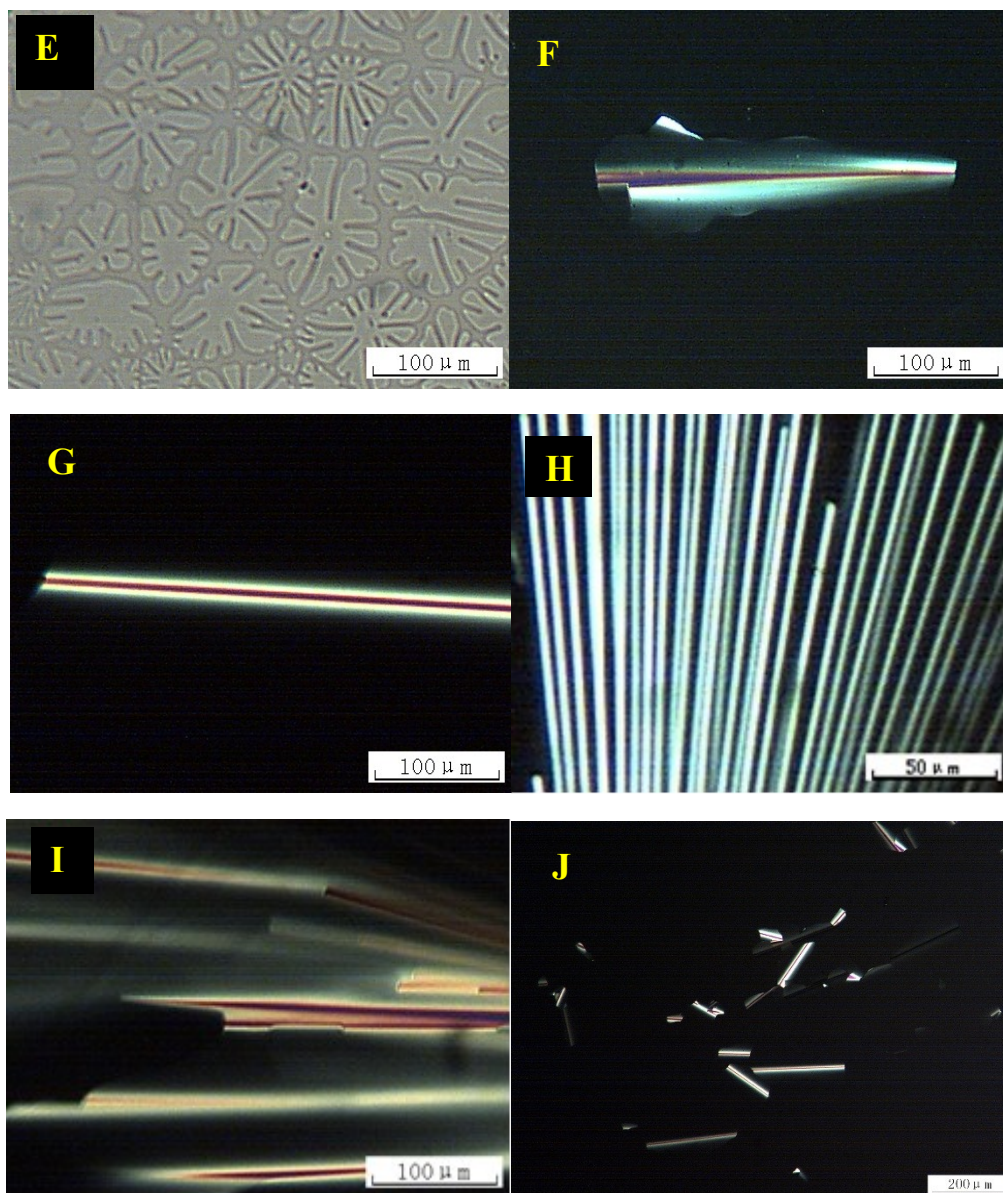

**Figure S2.** Polarising optical photomicrographes of the mesogens of series **M** show large homeotropic domains with straight defect lines and developable domains, in agreement with hexagonal columnar mesophases. Note the characteristic homeotropically grown hexagonal columnar domains in picture E. A: **M1** at 297°C; B,C: **M2** at 255 and 220°C; D,E,F: **M3** at 250, 284 and 256°C; G,H,I: **M4** at 248, 250 and 245°C; J: **M5** at 198°C.



#### 4. DSC and TGA

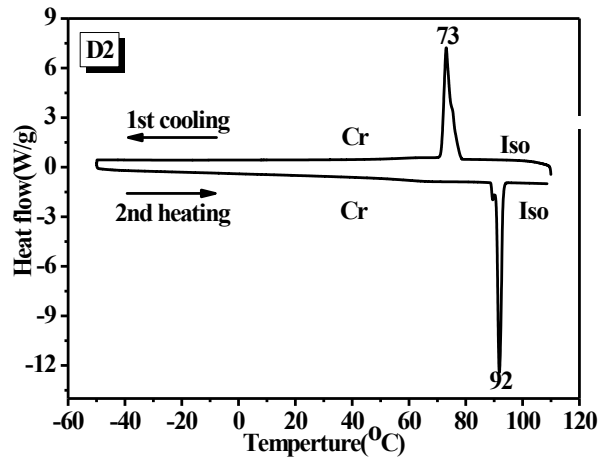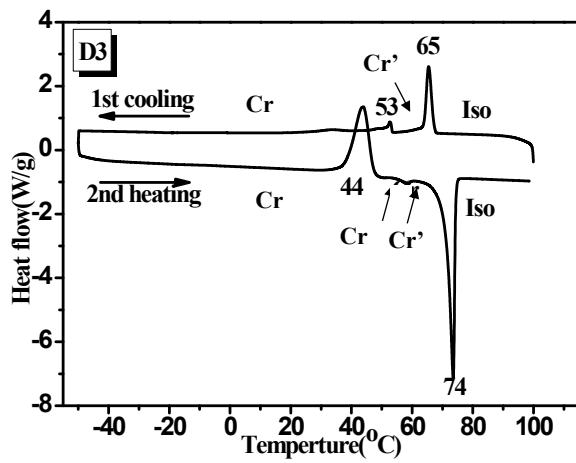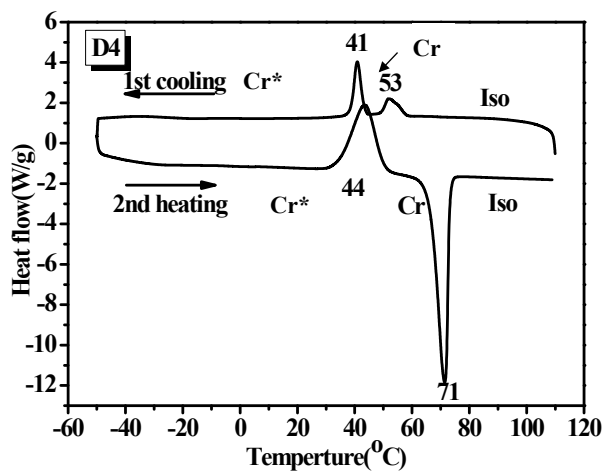

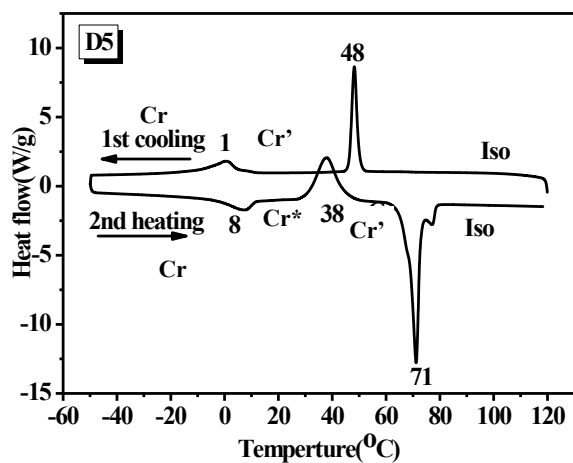

**Figure S3.** DSC curves of intermediate tetraarylthieno[3,2-b]thiophenes **D2-D5** (heating/cooling rate 5°C/min)

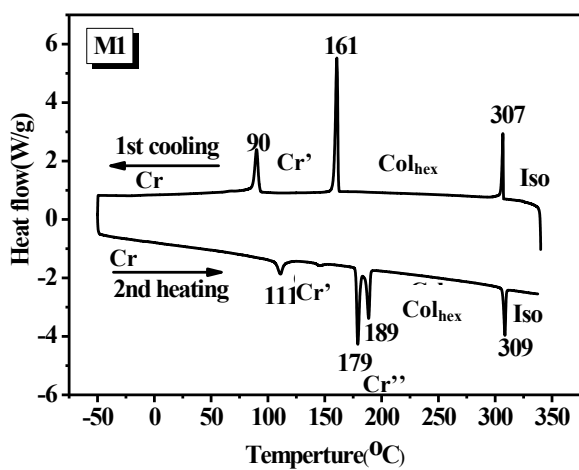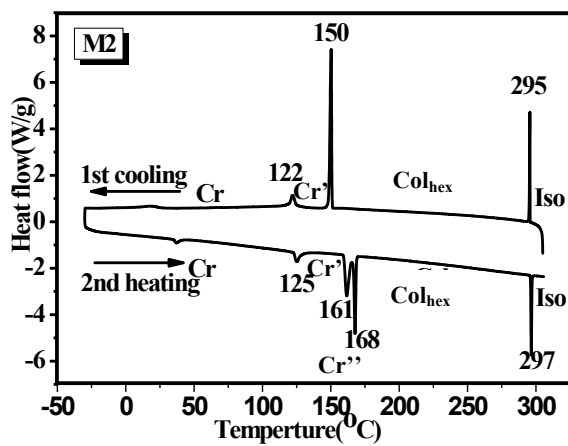

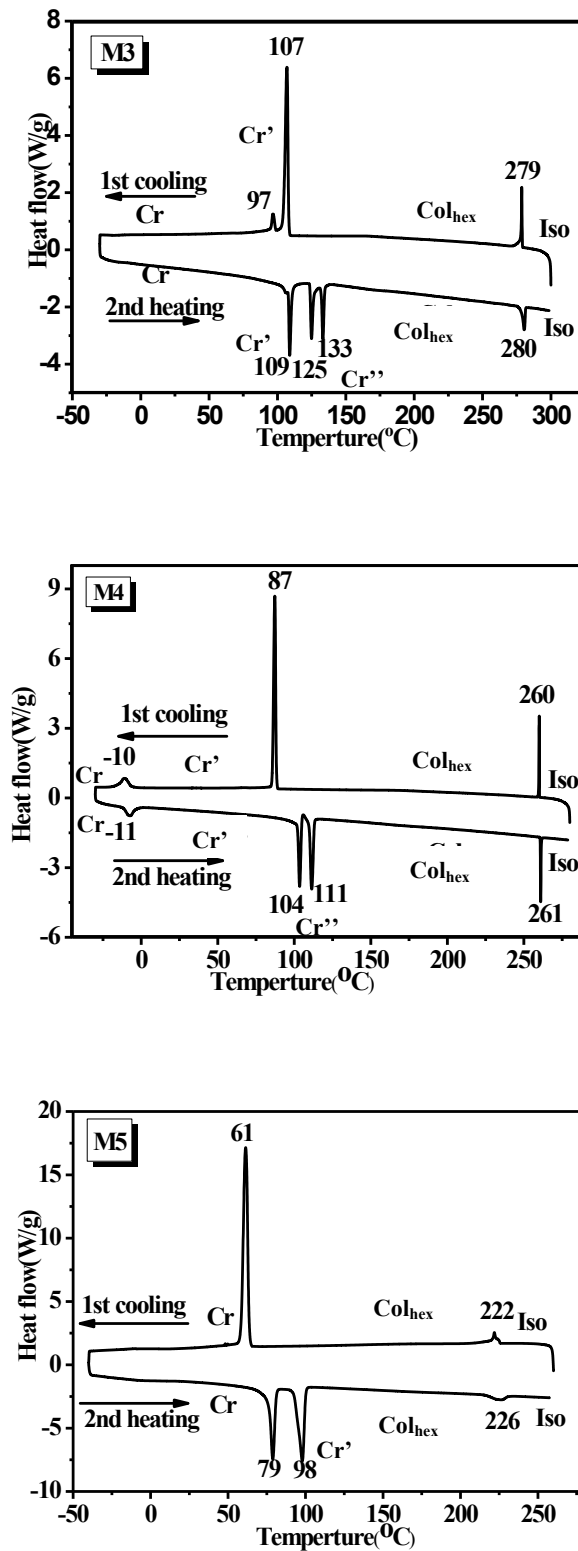

**Figure S4.** DSC curves of H-shaped columnar mesogens **M1-M5** (heating/cooling rate 5°C/min).

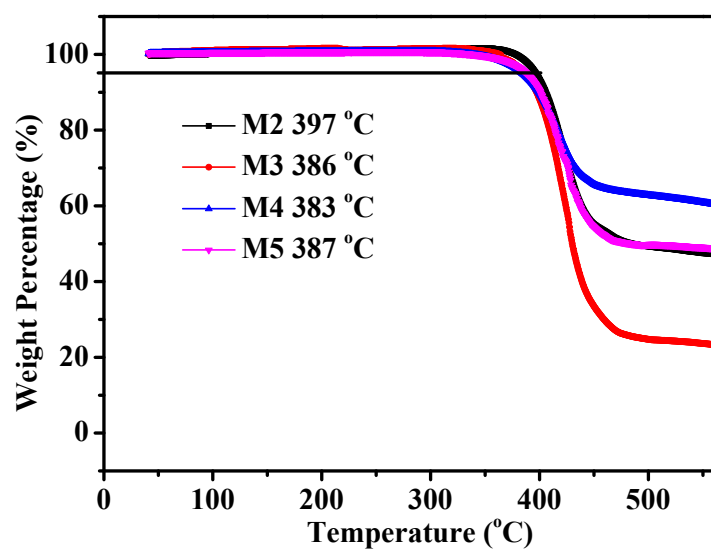

**Figure S5.** TGA curves. The temperatures shown in graph are the decomposition temperatures (5% weight loss temperature) of the compounds **M2-M5**.

## 5. SAXS

**Table S1:** Table of indexation†

|                        | $d_{\text{meas}}$ (Å) [sh/br/ $\xi$ (nm), Intensity]                                                                                                    | ( $hk$ )<br>Peak                                                       | $d_{\text{calc}}$ (Å)             | Mesophase<br>parameters                           |
|------------------------|---------------------------------------------------------------------------------------------------------------------------------------------------------|------------------------------------------------------------------------|-----------------------------------|---------------------------------------------------|
| <b>M1</b><br>T = 240°C | 20.32 [sh, VS]<br>(11.73) [sh, M]<br>10.17 [sh, W]<br>7.67 (sh, W)<br>14.5 [ $\xi$ =6, S]<br>5.2 [ $\xi$ =5, W]<br>4.5 [br, VS]<br>3.76 [ $\xi$ =5, S]  | 10<br>11<br>20<br>21<br>$D_1$<br>$D_2$<br>$h_{\text{ch}}$<br>$h_{\pi}$ | 20.32<br>(11.73)<br>10.16<br>7.68 | $a = 23.5 \text{ \AA}$<br>$A = 478 \text{ \AA}^2$ |
| <b>M2</b><br>T = 230°C | 20.52 [sh, VS]<br>(11.84) [sh, VW]<br>10.32 [sh, W]<br>7.75 [sh, W]<br>13.8 [ $\xi$ =6, M]<br>5.3 [ $\xi$ =7, M]<br>4.5 [br, VS]<br>3.82 [ $\xi$ =3, M] | 10<br>11<br>20<br>21<br>$D_1$<br>$D_2$<br>$h_{\text{ch}}$<br>$h_{\pi}$ | 20.55<br>(11.87)<br>10.28<br>7.77 | $a = 23.7 \text{ \AA}$<br>$A = 488 \text{ \AA}^2$ |
| <b>M3</b><br>T = 210°C | 23.0 [sh, VS]<br>11.6 [sh, W]<br>13.8 [ $\xi$ =6, M]<br>5.3 [ $\xi$ =6, W]<br>4.5 [br, VS]<br>3.76 [ $\xi$ =3, S]                                       | 10<br>20<br>$D_1$<br>$D_2$<br>$h_{\text{ch}}$<br>$h_{\pi}$             | 23.1<br>11.55                     | $a = 26.7 \text{ \AA}$<br>$A = 616 \text{ \AA}^2$ |
| <b>M4</b><br>T = 200°C | 24.45 [sh, VS]<br>(14.12) [sh, W]<br>12.4 [sh, W]<br>13.8 [ $\xi$ =8, M]<br>5.4 [ $\xi$ =7, W]<br>4.5 [br, VS]<br>3.76 [ $\xi$ =2, S]                   | 10<br>11<br>20<br>$D_1$<br>$D_2$<br>$h_{\text{ch}}$<br>$h_{\pi}$       | 24.6<br>(14.21)<br>12.3           | $a = 28.4 \text{ \AA}$<br>$A = 700 \text{ \AA}^2$ |
| <b>M5</b><br>T = 180°C | 27.09 [sh, VS]<br>15.68 [sh, M]<br>13.50 [sh, W]<br>13.8 [ $\xi$ =6, M]<br>5.2 [ $\xi$ =6, W]<br>4.5 [br, VS]<br>3.73 [ $\xi$ =4, VS]                   | 10<br>11<br>20<br>$D_1$<br>$D_2$<br>$h_{\text{ch}}$<br>$h_{\pi}$       | 27.08<br>15.64<br>13.54           | $a = 31.3 \text{ \AA}$<br>$A = 847 \text{ \AA}^2$ |

† $d_{\text{meas}}$ , measured periodicities of the reflections from columnar lattice with indexation ( $hk$ ) (Miller indices); “sh” and “br” stand for sharp reflections and broad scatterings; Intensity of reflections and scattering signals (VS: very strong, S: strong, M: medium, W: weak, VW: very weak), and associated correlation lengths  $\xi$  for signals from short-range correlated structure  $D_i$  and from lateral distances between molecular segments  $h_i$ ; short-range correlated periodicities  $D_1$  and  $D_2$ , and lateral distances between chains ( $h_{\text{ch}}$ ), and face-to-face piled triphenylene rings ( $h_{\pi}$ );  $d_{\text{calc}}$ , calculated spacing from optimized lattice parameter; lattice parameter ( $a$ ), lattice area ( $S$ ).



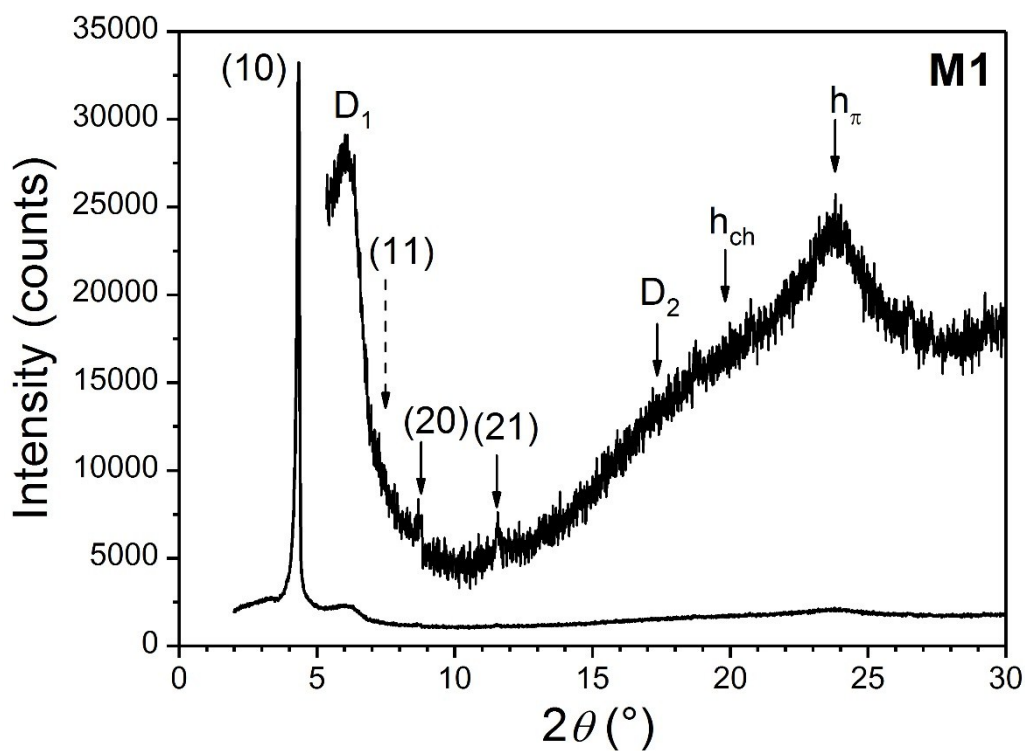

Figure S6. SAXS pattern of compound **M1** at 240°C.

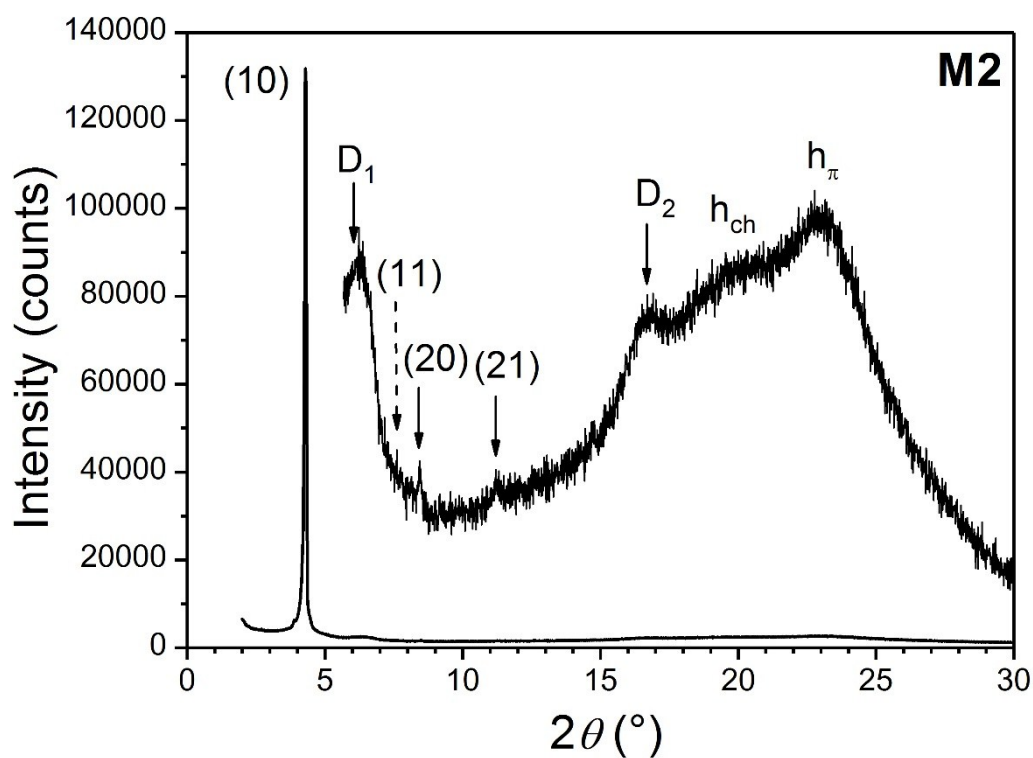

Figure S7. SAXS pattern of compound **M2** at 230°C.

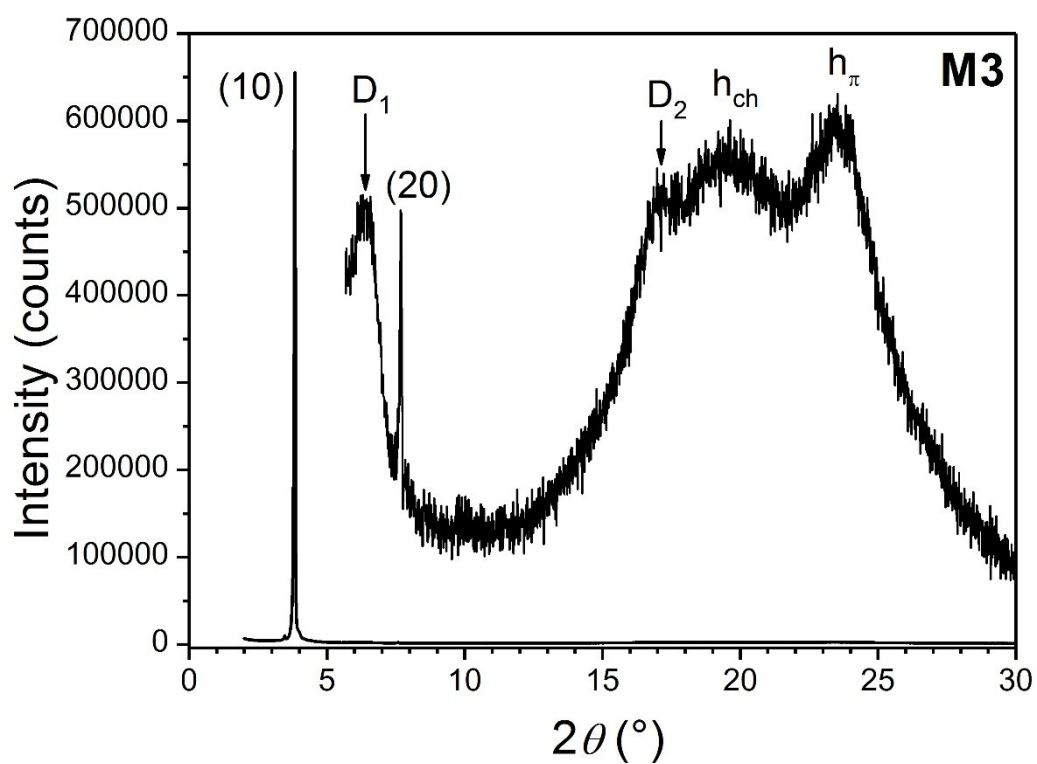

Figure S8. SAXS pattern of compound M3 at 210°C.

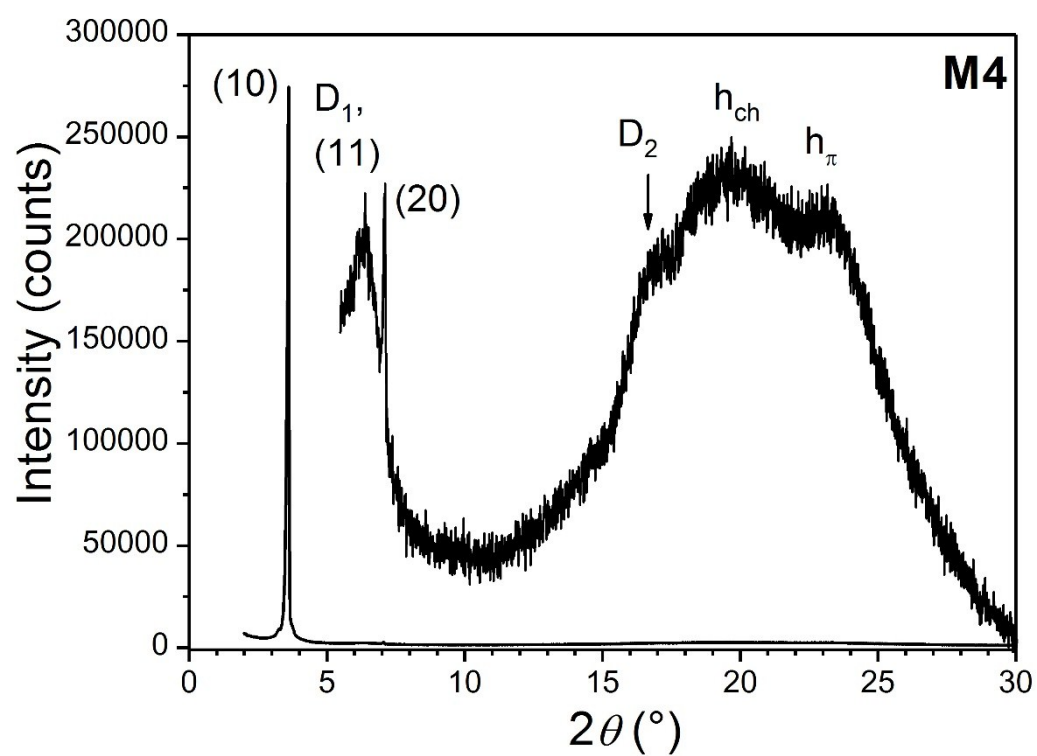

Figure S9. SAXS pattern of compound M4 at 200°C.

## 6. TOF data and POM images in cell

**Table S2:** Electron and hole mobility at various temperatures and electric fields for mesogen **M4** (with liquid crystal cell thickness 16.4  $\mu\text{m}$ )

| Temperature / $^{\circ}\text{C}$ | Electric field/V | Transit time/s        | Hole mobility/ $\text{cm}^2 \text{V}^{-1}\text{s}^{-1}$ | Transit time/s        | Electron mobility/ $\text{cm}^2 \text{V}^{-1}\text{s}^{-1}$ |
|----------------------------------|------------------|-----------------------|---------------------------------------------------------|-----------------------|-------------------------------------------------------------|
| 230                              | $2 \times 10^4$  | $4.94 \times 10^{-5}$ | $1.66 \times 10^{-3}$                                   | $4.64 \times 10^{-5}$ | $1.77 \times 10^{-3}$                                       |
| 230                              | $3 \times 10^4$  | $3.35 \times 10^{-5}$ | $1.63 \times 10^{-3}$                                   | $3.02 \times 10^{-5}$ | $1.81 \times 10^{-3}$                                       |
| 230                              | $4 \times 10^4$  | $2.39 \times 10^{-5}$ | $1.71 \times 10^{-3}$                                   | $1.73 \times 10^{-5}$ | $2.37 \times 10^{-3}$                                       |
| 230                              | $5 \times 10^4$  | $1.94 \times 10^{-5}$ | $1.69 \times 10^{-3}$                                   | $1.68 \times 10^{-5}$ | $1.95 \times 10^{-3}$                                       |
| 220                              | $2 \times 10^4$  | $4.50 \times 10^{-5}$ | $1.82 \times 10^{-3}$                                   | $4.69 \times 10^{-5}$ | $1.75 \times 10^{-3}$                                       |
| 220                              | $3 \times 10^4$  | $3.42 \times 10^{-5}$ | $1.60 \times 10^{-3}$                                   | $3.13 \times 10^{-5}$ | $1.75 \times 10^{-3}$                                       |
| 220                              | $4 \times 10^4$  | $2.42 \times 10^{-5}$ | $1.70 \times 10^{-3}$                                   | $2.34 \times 10^{-5}$ | $1.75 \times 10^{-3}$                                       |
| 220                              | $5 \times 10^4$  | $2.03 \times 10^{-5}$ | $1.61 \times 10^{-3}$                                   | $1.89 \times 10^{-5}$ | $1.73 \times 10^{-3}$                                       |
| 210                              | $2 \times 10^4$  | $5.05 \times 10^{-5}$ | $1.62 \times 10^{-3}$                                   | $5.18 \times 10^{-5}$ | $1.58 \times 10^{-3}$                                       |
| 210                              | $3 \times 10^4$  | $3.51 \times 10^{-5}$ | $1.56 \times 10^{-3}$                                   | $3.43 \times 10^{-5}$ | $1.59 \times 10^{-3}$                                       |
| 210                              | $4 \times 10^4$  | $2.61 \times 10^{-5}$ | $1.57 \times 10^{-3}$                                   | $2.50 \times 10^{-5}$ | $1.64 \times 10^{-3}$                                       |
| 210                              | $5 \times 10^4$  | $2.11 \times 10^{-5}$ | $1.55 \times 10^{-3}$                                   | $2.06 \times 10^{-5}$ | $1.59 \times 10^{-3}$                                       |
| 200                              | $2 \times 10^4$  | $5.49 \times 10^{-5}$ | $1.49 \times 10^{-3}$                                   | $5.40 \times 10^{-5}$ | $1.52 \times 10^{-3}$                                       |
| 200                              | $3 \times 10^4$  | $3.78 \times 10^{-5}$ | $1.45 \times 10^{-3}$                                   | $3.50 \times 10^{-5}$ | $1.56 \times 10^{-3}$                                       |
| 200                              | $4 \times 10^4$  | $2.84 \times 10^{-5}$ | $1.44 \times 10^{-3}$                                   | $2.69 \times 10^{-5}$ | $1.52 \times 10^{-3}$                                       |
| 200                              | $5 \times 10^4$  | $2.27 \times 10^{-5}$ | $1.44 \times 10^{-3}$                                   | $2.17 \times 10^{-5}$ | $1.51 \times 10^{-3}$                                       |
| 190                              | $2 \times 10^4$  | $5.57 \times 10^{-5}$ | $1.47 \times 10^{-3}$                                   | $6.14 \times 10^{-5}$ | $1.34 \times 10^{-3}$                                       |
| 190                              | $3 \times 10^4$  | $4.32 \times 10^{-5}$ | $1.27 \times 10^{-3}$                                   | $3.83 \times 10^{-5}$ | $1.43 \times 10^{-3}$                                       |
| 190                              | $4 \times 10^4$  | $3.08 \times 10^{-5}$ | $1.33 \times 10^{-3}$                                   | $2.87 \times 10^{-5}$ | $1.43 \times 10^{-3}$                                       |
| 190                              | $5 \times 10^4$  | $2.48 \times 10^{-5}$ | $1.32 \times 10^{-3}$                                   | $2.50 \times 10^{-5}$ | $1.31 \times 10^{-3}$                                       |
| 180                              | $2 \times 10^4$  | $6.57 \times 10^{-5}$ | $1.25 \times 10^{-3}$                                   | $6.59 \times 10^{-5}$ | $1.24 \times 10^{-3}$                                       |
| 180                              | $3 \times 10^4$  | $4.47 \times 10^{-5}$ | $1.22 \times 10^{-3}$                                   | $4.27 \times 10^{-5}$ | $1.28 \times 10^{-3}$                                       |
| 180                              | $4 \times 10^4$  | $3.28 \times 10^{-5}$ | $1.25 \times 10^{-3}$                                   | $3.36 \times 10^{-5}$ | $1.22 \times 10^{-3}$                                       |
| 180                              | $5 \times 10^4$  | $2.64 \times 10^{-5}$ | $1.24 \times 10^{-3}$                                   | $2.26 \times 10^{-5}$ | $1.23 \times 10^{-3}$                                       |
| 170                              | $2 \times 10^4$  | $7.08 \times 10^{-5}$ | $1.16 \times 10^{-3}$                                   | $6.59 \times 10^{-5}$ | $1.23 \times 10^{-3}$                                       |
| 170                              | $3 \times 10^4$  | $4.64 \times 10^{-5}$ | $1.18 \times 10^{-3}$                                   | $4.27 \times 10^{-5}$ | $1.19 \times 10^{-3}$                                       |
| 170                              | $4 \times 10^4$  | $3.49 \times 10^{-5}$ | $1.17 \times 10^{-3}$                                   | $3.36 \times 10^{-5}$ | $1.24 \times 10^{-3}$                                       |
| 170                              | $5 \times 10^4$  | $2.80 \times 10^{-5}$ | $1.17 \times 10^{-3}$                                   | $2.66 \times 10^{-5}$ | $1.22 \times 10^{-3}$                                       |
| 160                              | $2 \times 10^4$  | $6.81 \times 10^{-5}$ | $1.20 \times 10^{-3}$                                   | $6.48 \times 10^{-5}$ | $1.27 \times 10^{-3}$                                       |
| 160                              | $3 \times 10^4$  | $4.60 \times 10^{-5}$ | $1.19 \times 10^{-3}$                                   | $4.49 \times 10^{-5}$ | $1.22 \times 10^{-3}$                                       |
| 160                              | $4 \times 10^4$  | $3.38 \times 10^{-5}$ | $1.21 \times 10^{-3}$                                   | $3.36 \times 10^{-5}$ | $1.22 \times 10^{-3}$                                       |
| 160                              | $5 \times 10^4$  | $2.68 \times 10^{-5}$ | $1.22 \times 10^{-3}$                                   | $2.68 \times 10^{-5}$ | $1.22 \times 10^{-3}$                                       |
| 150                              | $2 \times 10^4$  | $6.59 \times 10^{-5}$ | $1.24 \times 10^{-3}$                                   | $6.78 \times 10^{-5}$ | $1.21 \times 10^{-3}$                                       |
| 150                              | $3 \times 10^4$  | $4.22 \times 10^{-5}$ | $1.29 \times 10^{-3}$                                   | $4.22 \times 10^{-5}$ | $1.30 \times 10^{-3}$                                       |
| 150                              | $4 \times 10^4$  | $3.20 \times 10^{-5}$ | $1.28 \times 10^{-3}$                                   | $3.02 \times 10^{-5}$ | $1.36 \times 10^{-3}$                                       |
| 150                              | $5 \times 10^4$  | $2.57 \times 10^{-5}$ | $1.27 \times 10^{-3}$                                   | $2.41 \times 10^{-5}$ | $1.36 \times 10^{-3}$                                       |
| 140                              | $2 \times 10^4$  | $6.44 \times 10^{-5}$ | $1.27 \times 10^{-3}$                                   |                       |                                                             |
| 140                              | $3 \times 10^4$  | $4.13 \times 10^{-5}$ | $1.32 \times 10^{-3}$                                   | $3.72 \times 10^{-5}$ | $1.47 \times 10^{-3}$                                       |
| 140                              | $2 \times 10^4$  | $3.09 \times 10^{-5}$ | $1.33 \times 10^{-3}$                                   | $2.88 \times 10^{-5}$ | $1.42 \times 10^{-3}$                                       |
| 140                              | $3 \times 10^4$  | $2.44 \times 10^{-5}$ | $1.35 \times 10^{-3}$                                   | $2.44 \times 10^{-5}$ | $1.35 \times 10^{-3}$                                       |
| 130                              | $2 \times 10^4$  | $6.36 \times 10^{-5}$ | $1.29 \times 10^{-3}$                                   |                       |                                                             |
| 130                              | $3 \times 10^4$  | $4.13 \times 10^{-5}$ | $1.32 \times 10^{-3}$                                   | $3.72 \times 10^{-5}$ | $1.47 \times 10^{-3}$                                       |
| 130                              | $4 \times 10^4$  | $3.09 \times 10^{-5}$ | $1.33 \times 10^{-3}$                                   | $2.88 \times 10^{-5}$ | $1.42 \times 10^{-3}$                                       |
| 130                              | $5 \times 10^4$  | $2.44 \times 10^{-5}$ | $1.35 \times 10^{-3}$                                   | $2.44 \times 10^{-5}$ | $1.35 \times 10^{-3}$                                       |
| 120                              | $2 \times 10^4$  | $6.87 \times 10^{-5}$ | $1.19 \times 10^{-3}$                                   | $6.31 \times 10^{-5}$ | $1.30 \times 10^{-3}$                                       |
| 120                              | $3 \times 10^4$  | $4.62 \times 10^{-5}$ | $1.18 \times 10^{-3}$                                   | $4.52 \times 10^{-5}$ | $1.21 \times 10^{-3}$                                       |
| 120                              | $4 \times 10^4$  | $3.36 \times 10^{-5}$ | $1.22 \times 10^{-3}$                                   | $3.09 \times 10^{-5}$ | $1.33 \times 10^{-3}$                                       |
| 120                              | $5 \times 10^4$  | $2.62 \times 10^{-5}$ | $1.25 \times 10^{-3}$                                   | $2.68 \times 10^{-5}$ | $1.23 \times 10^{-3}$                                       |
| 110                              | $2 \times 10^4$  | $6.71 \times 10^{-5}$ | $1.22 \times 10^{-3}$                                   | $6.83 \times 10^{-5}$ | $1.20 \times 10^{-3}$                                       |
| 110                              | $3 \times 10^4$  | $4.95 \times 10^{-5}$ | $1.10 \times 10^{-3}$                                   | $4.79 \times 10^{-5}$ | $1.14 \times 10^{-3}$                                       |
| 110                              | $4 \times 10^4$  | $3.68 \times 10^{-5}$ | $1.11 \times 10^{-3}$                                   | $3.74 \times 10^{-5}$ | $1.10 \times 10^{-3}$                                       |

|     |                 |                       |                       |                       |                       |
|-----|-----------------|-----------------------|-----------------------|-----------------------|-----------------------|
| 110 | $5 \times 10^4$ | $2.78 \times 10^{-5}$ | $1.18 \times 10^{-3}$ | $2.54 \times 10^{-5}$ | $1.29 \times 10^{-3}$ |
| 100 | $2 \times 10^4$ | $7.46 \times 10^{-5}$ | $1.10 \times 10^{-3}$ | $6.90 \times 10^{-5}$ | $1.19 \times 10^{-3}$ |
| 100 | $3 \times 10^4$ | $5.01 \times 10^{-5}$ | $1.09 \times 10^{-3}$ | $5.18 \times 10^{-5}$ | $1.05 \times 10^{-3}$ |
| 100 | $4 \times 10^4$ | $3.78 \times 10^{-5}$ | $1.08 \times 10^{-3}$ | $3.68 \times 10^{-5}$ | $1.11 \times 10^{-3}$ |
| 100 | $5 \times 10^4$ | $3.02 \times 10^{-5}$ | $1.09 \times 10^{-3}$ | $2.92 \times 10^{-5}$ | $1.12 \times 10^{-3}$ |

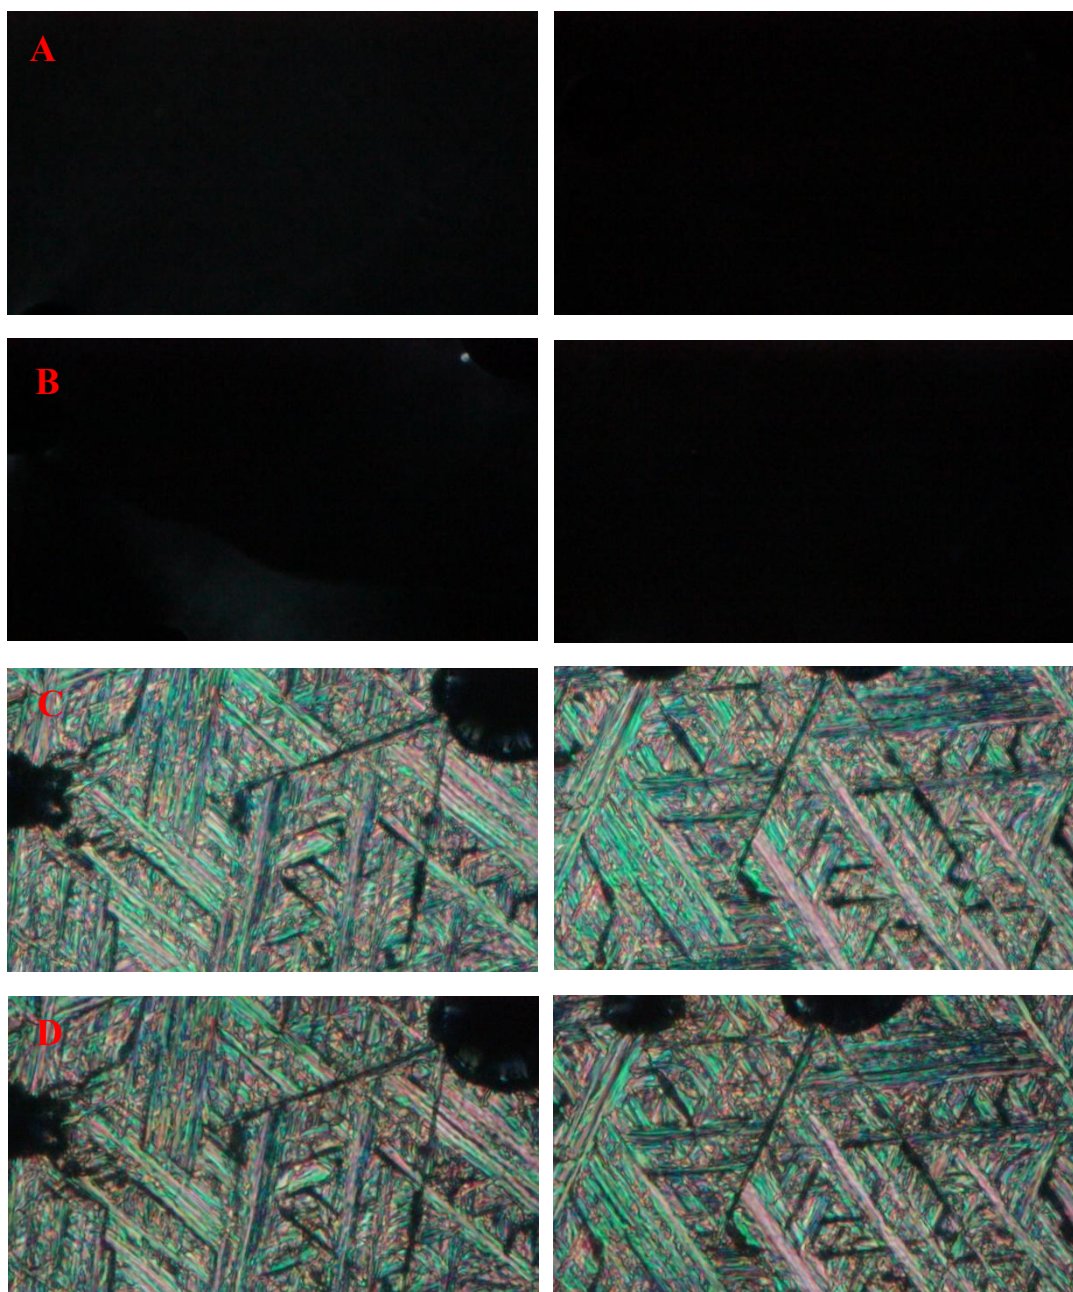

**Figure S10.** POM images taken during the TOF measurement (sample in ITO cell): A) Cooled to 220°C, and after rotating A&P by 45°(not stage rotation); B) Cooled to 120°C, and after rotating A&P by 45°(not stage rotation); C) Cooled to 80°C, and after rotating A&P by 45°(not stage rotation); D) Cooled to 27°C, and after rotating A&P by 45°(not stage rotation)

## 7. $^1\text{H}$ NMR

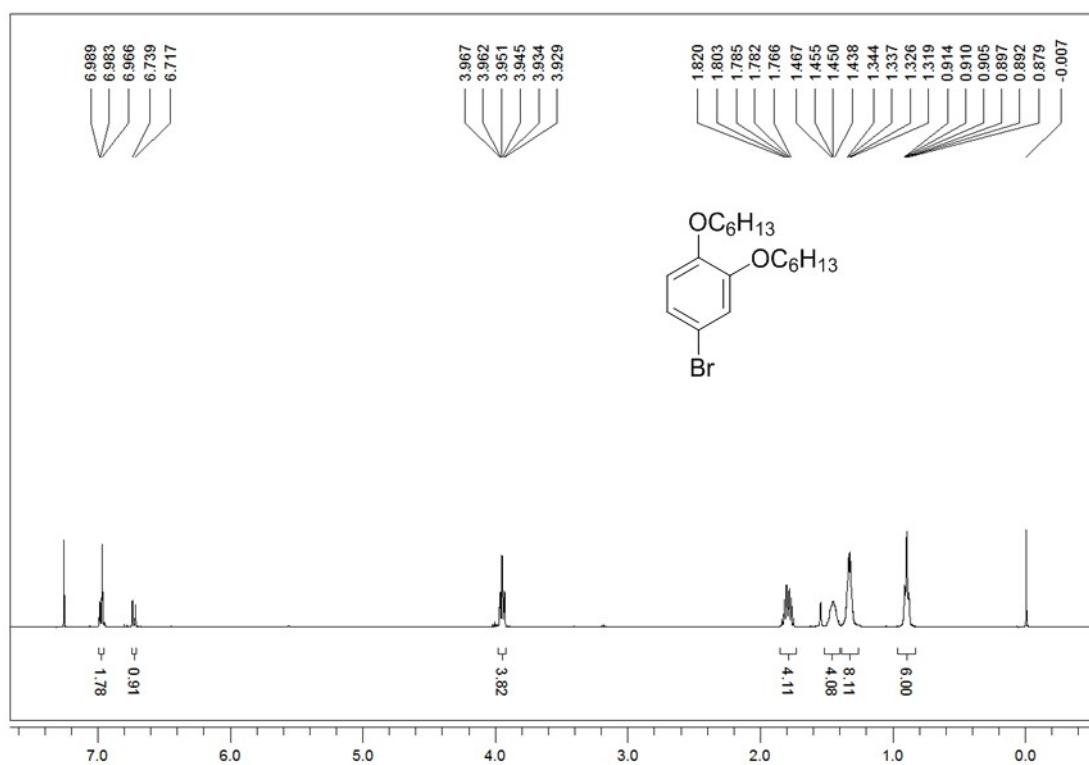

**Figure S11.**  $^1\text{H}$  NMR ( $\text{CDCl}_3$ , 400 MHz) spectrum of 4-bromo-1,2-bis(hexyloxy)benzene

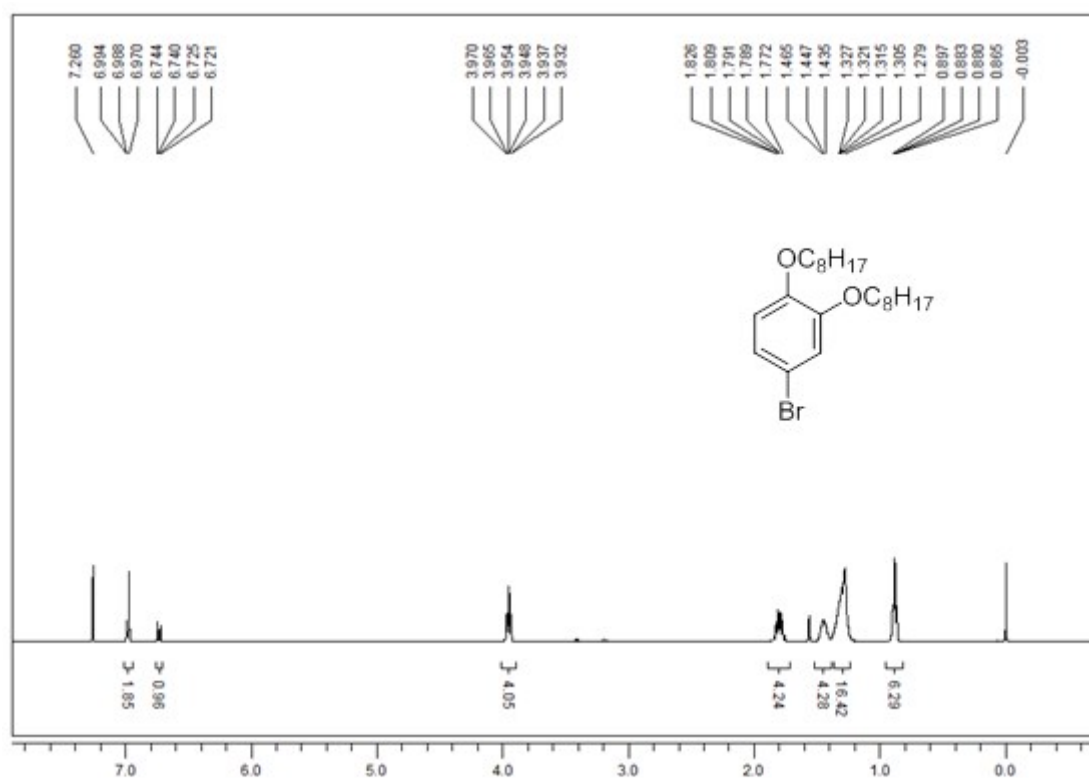

**Figure S12.**  $^1\text{H}$  NMR ( $\text{CDCl}_3$ , 400 MHz) spectrum of 4-bromo-1,2-bis(octyloxy)benzene



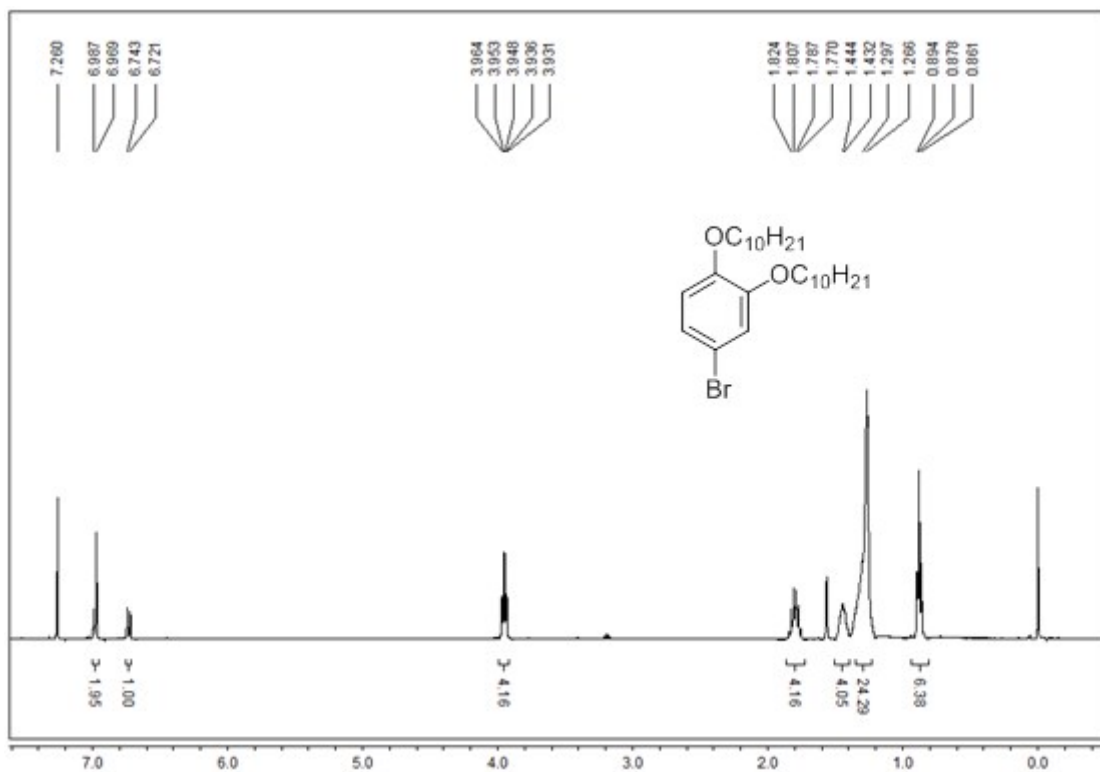

**Figure S13.**  $^1\text{H}$  NMR ( $\text{CDCl}_3$ , 400 MHz) spectrum of 4-bromo-1,2-bis(decyloxy)benzene

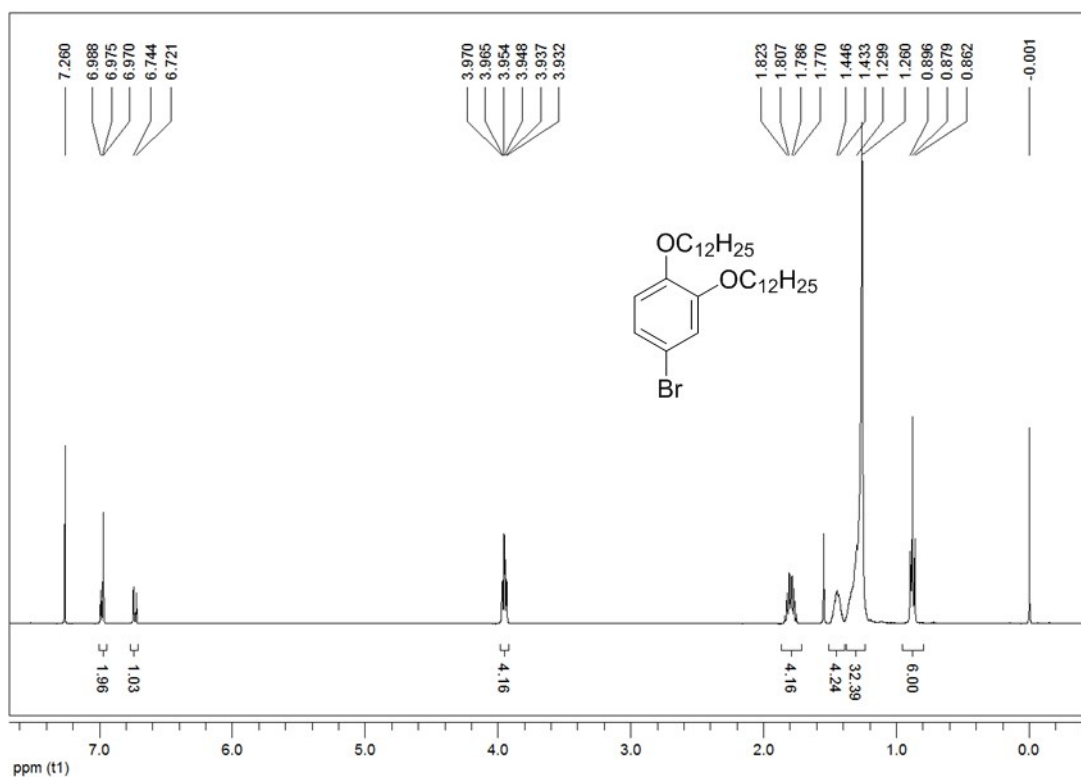

**Figure S14.**  $^1\text{H}$  NMR ( $\text{CDCl}_3$ , 400 MHz) spectrum of 4-bromo-1,2-bis(dodecyloxy)benzene

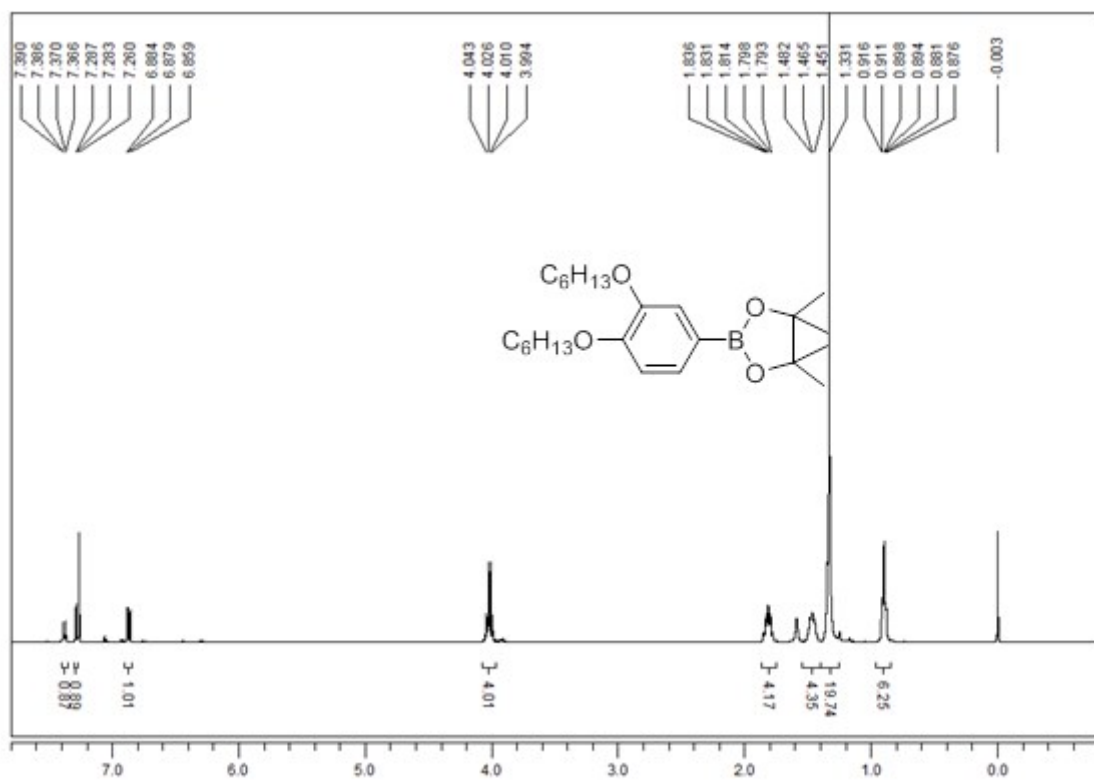

**Figure S15.**  $^1\text{H}$  NMR ( $\text{CDCl}_3$ , 400 MHz) spectrum of 2-(3,4-bis(hexyloxy)phenyl)-4,4,5,5-tetramethyl-1,3,2-dioxaborolane

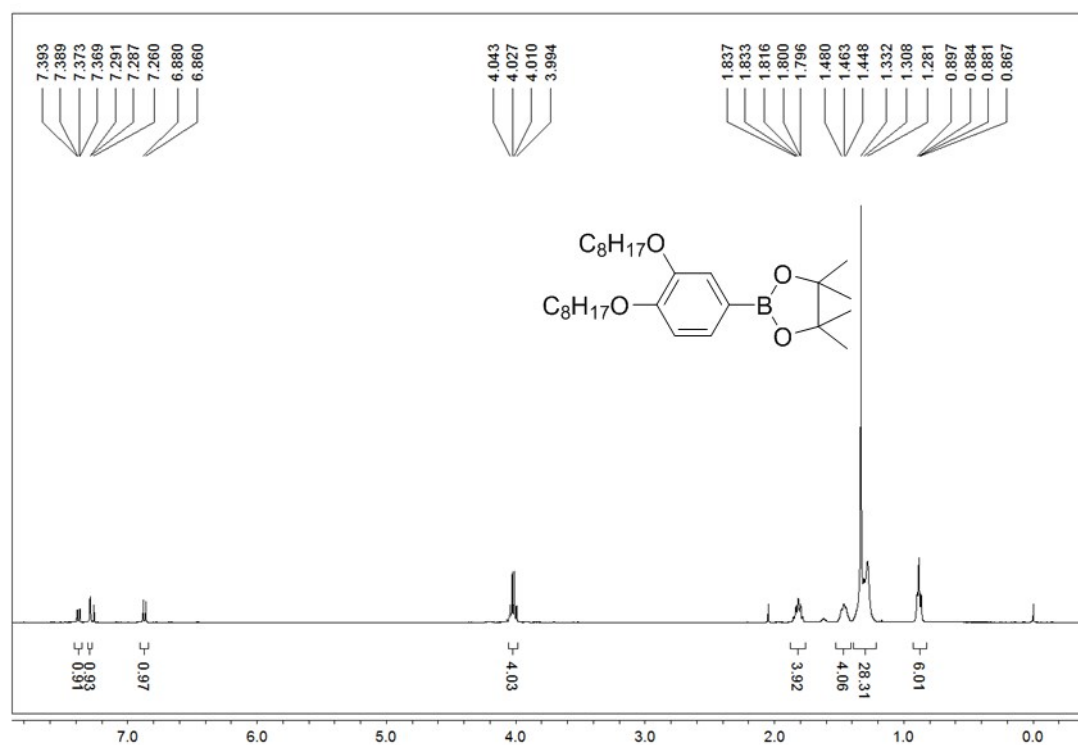

**Figure S16.**  $^1\text{H}$  NMR ( $\text{CDCl}_3$ , 400 MHz) spectrum of 2-(3,4-bis(octyloxy)phenyl)-4,4,5,5-tetramethyl-1,3,2-dioxaborolane

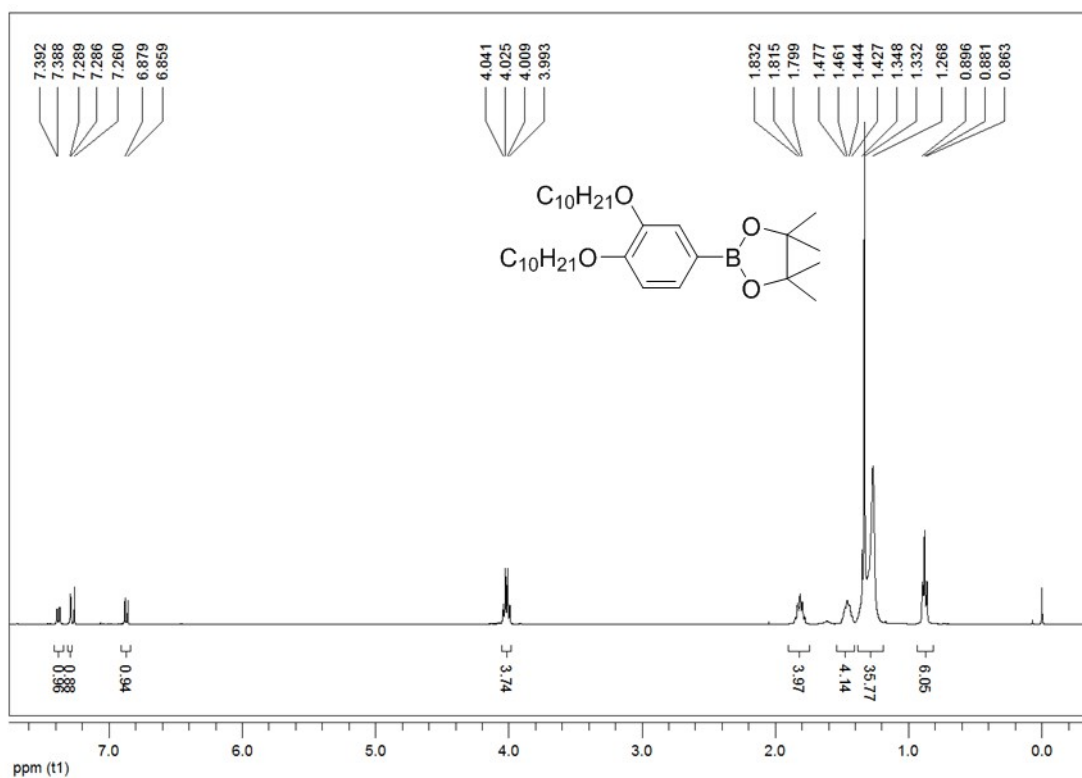

**Figure S17.**  $^1\text{H}$  NMR ( $\text{CDCl}_3$ , 400 MHz) spectrum of 2-(3,4-bis(decyloxy)phenyl)-4,4,5,5-tetramethyl-1,3,2-dioxaborolane

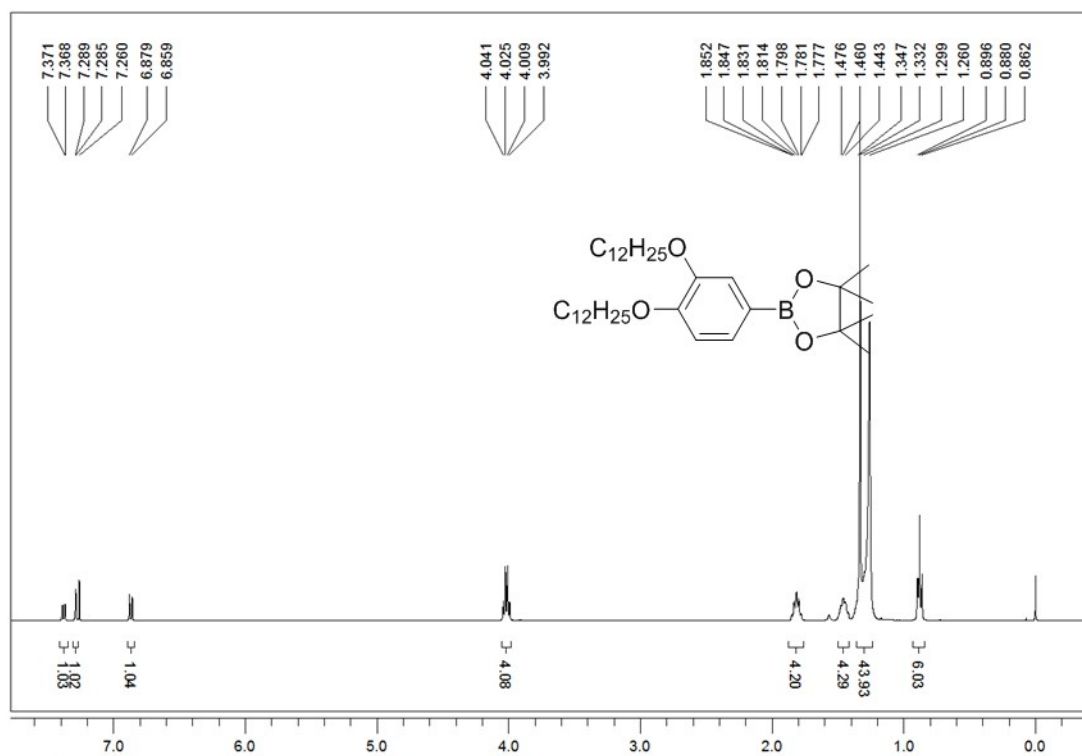

**Figure S18.**  $^1\text{H}$  NMR ( $\text{CDCl}_3$ , 400 MHz) spectrum of 2-(3,4-bis(dodecyloxy)phenyl)-4,4,5,5-tetramethyl-1,3,2-dioxaborolane

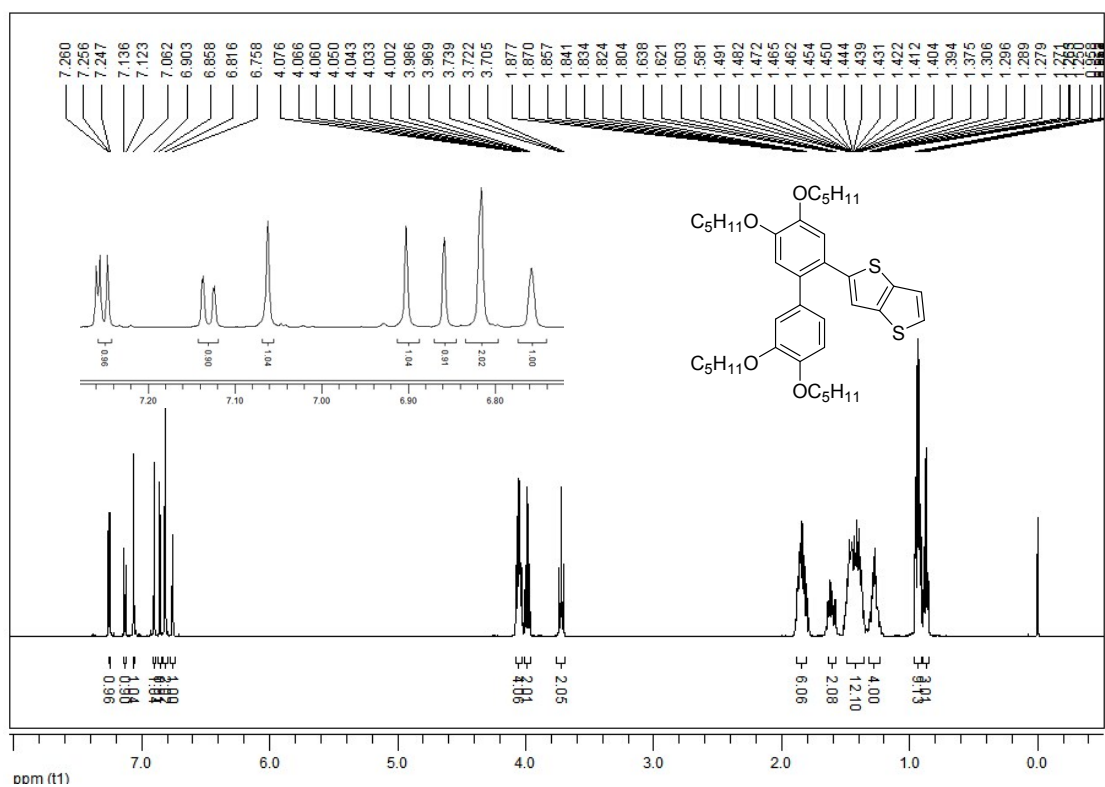

Figure S19.  $^1\text{H}$  NMR ( $\text{CDCl}_3$ , 400 MHz) spectrum of 1-2

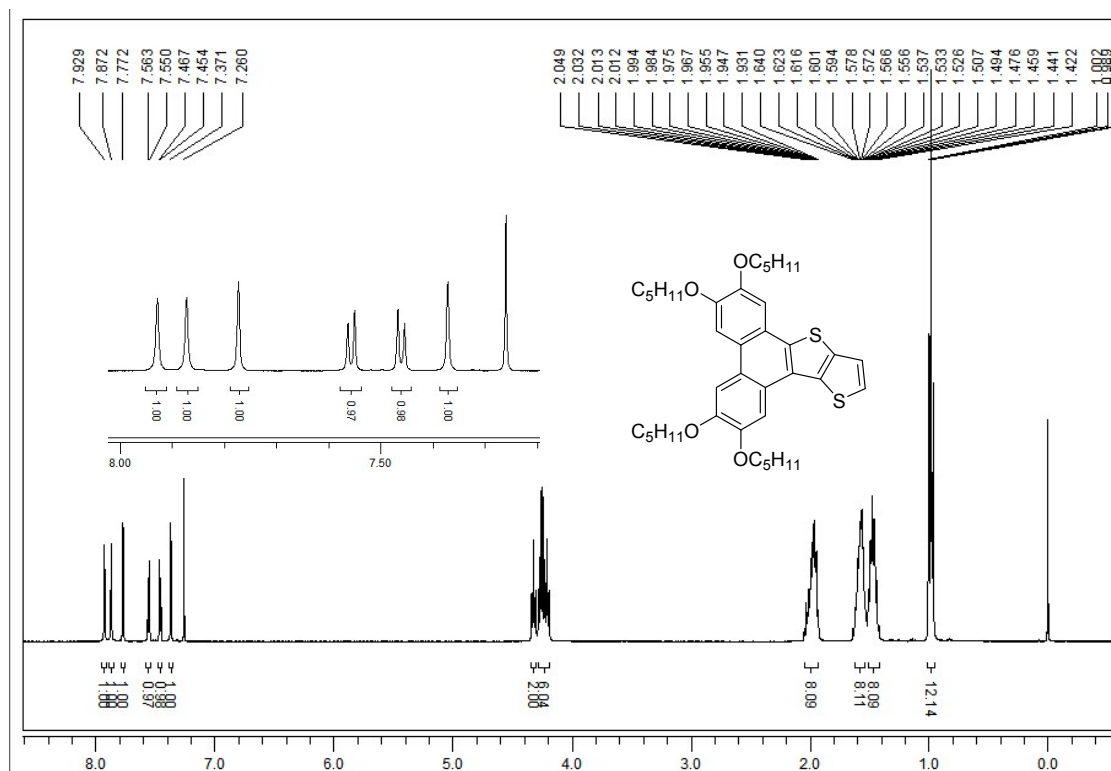

Figure S20.  $^1\text{H}$  NMR ( $\text{CDCl}_3$ , 400 MHz) spectrum of 1-3

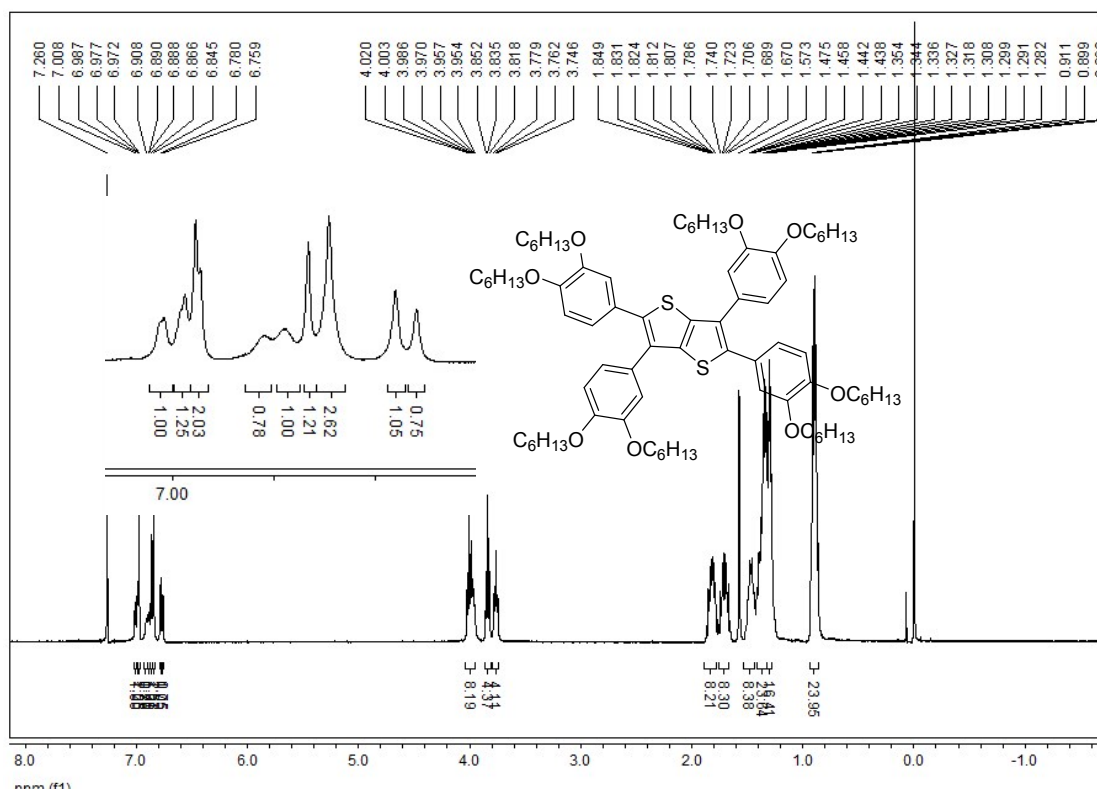

Figure S21. <sup>1</sup>H NMR(CDCl<sub>3</sub>,400 MHz) spectrum of D2

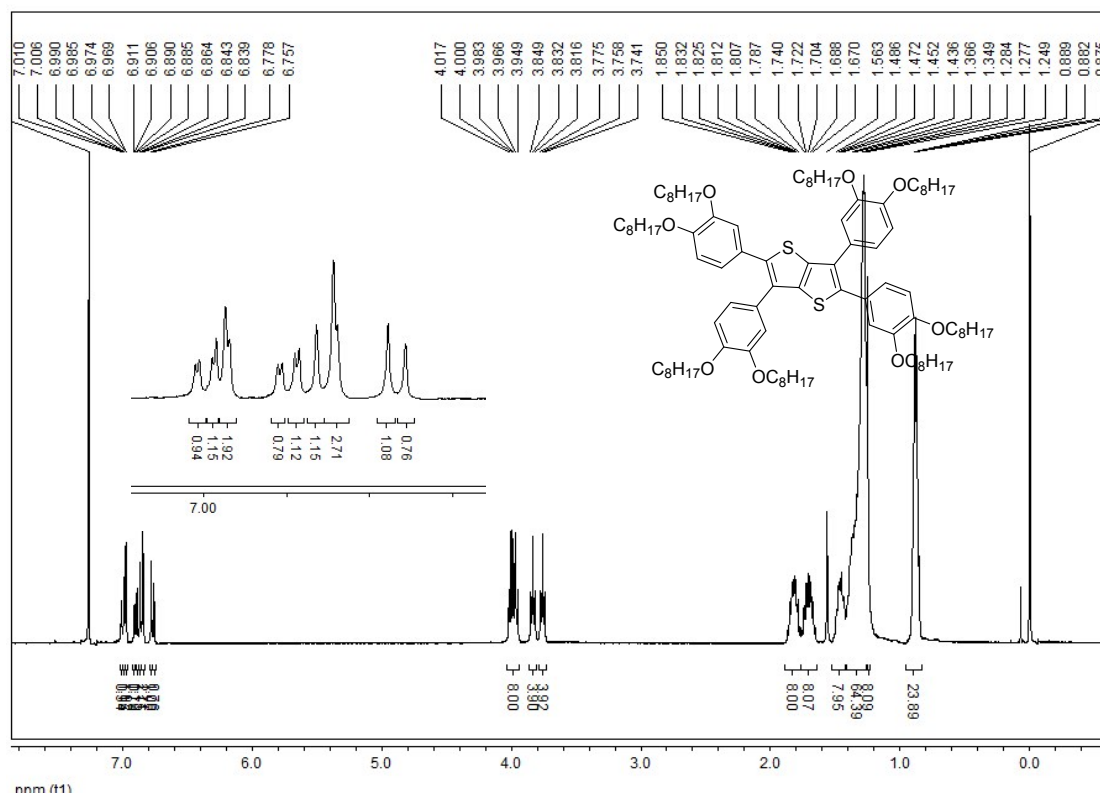

Figure S22. <sup>1</sup>H NMR (CDCl<sub>3</sub>,400 MHz) spectrum of D3



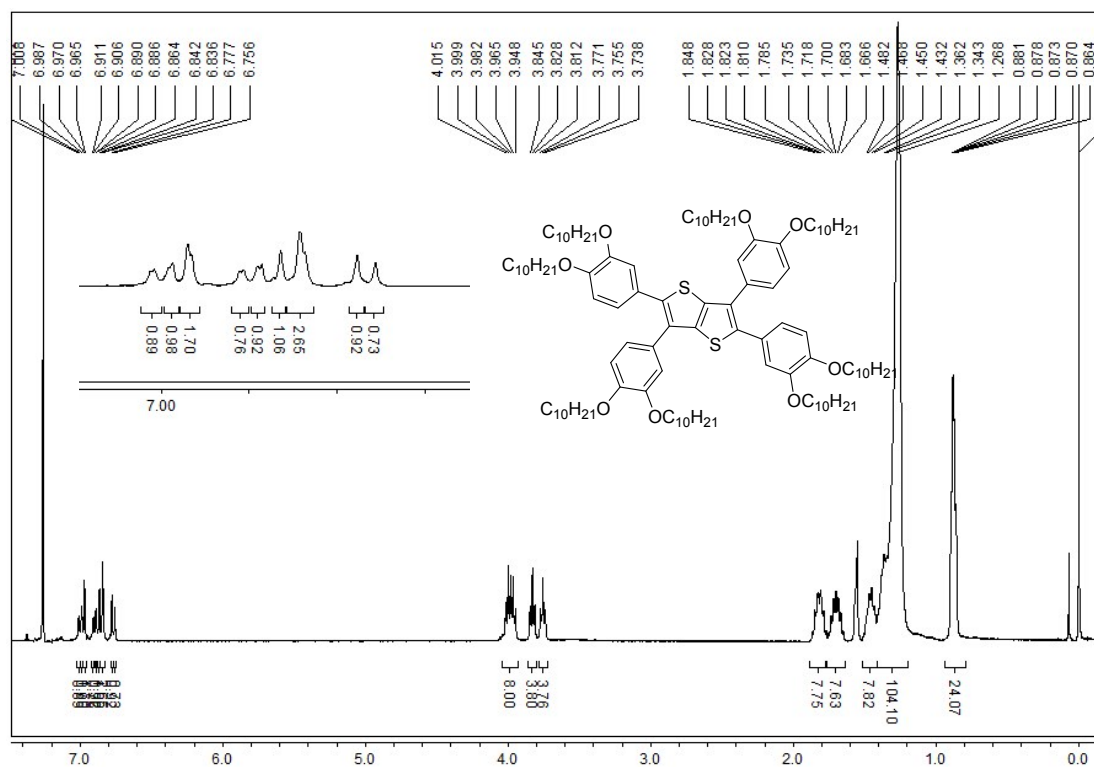

**Figure S23.** <sup>1</sup>H NMR (CDCl<sub>3</sub>, 400 MHz) spectrum of **D4**

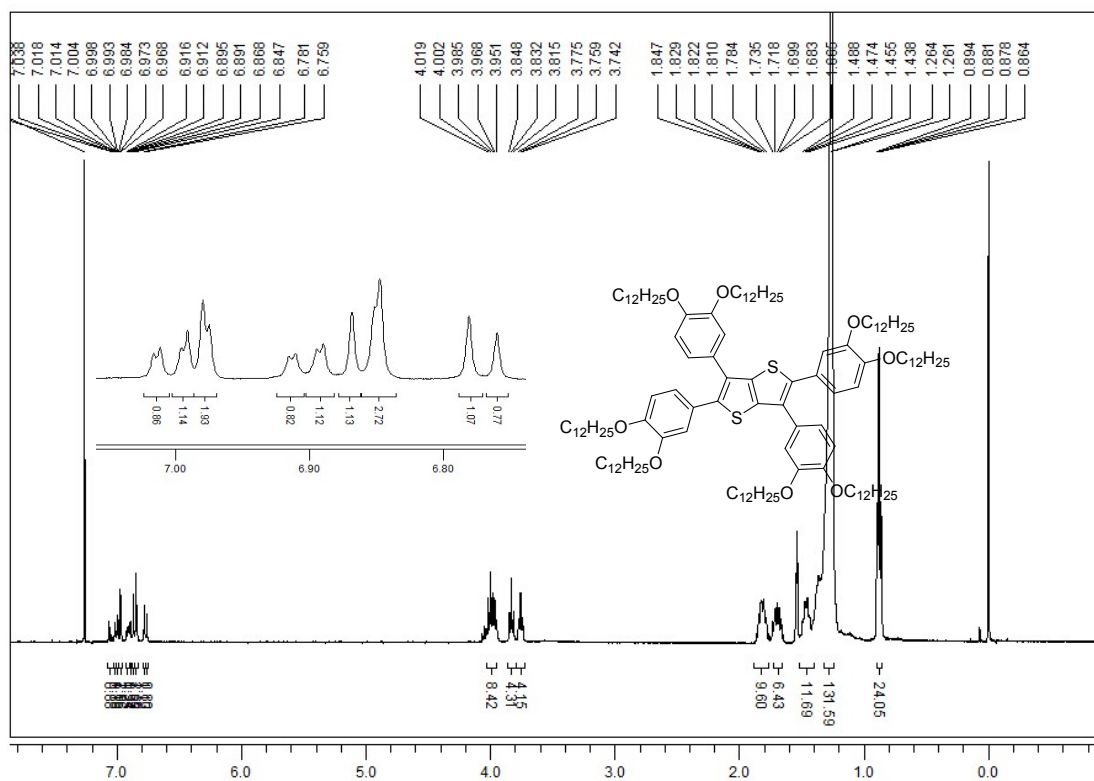

**Figure S24.** <sup>1</sup>H NMR (CDCl<sub>3</sub>, 400 MHz) spectrum of **D5**

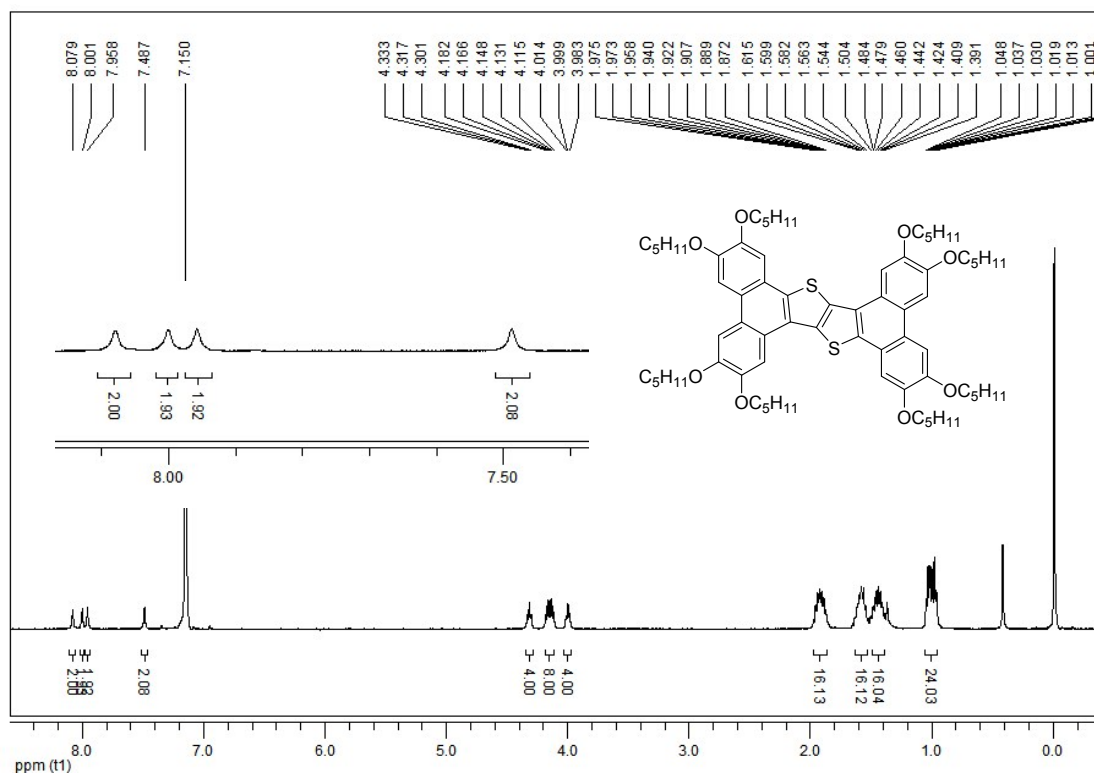

Figure S25.  $^1\text{H}$  NMR ( $\text{CDCl}_3$ , 400 MHz) spectrum of M1

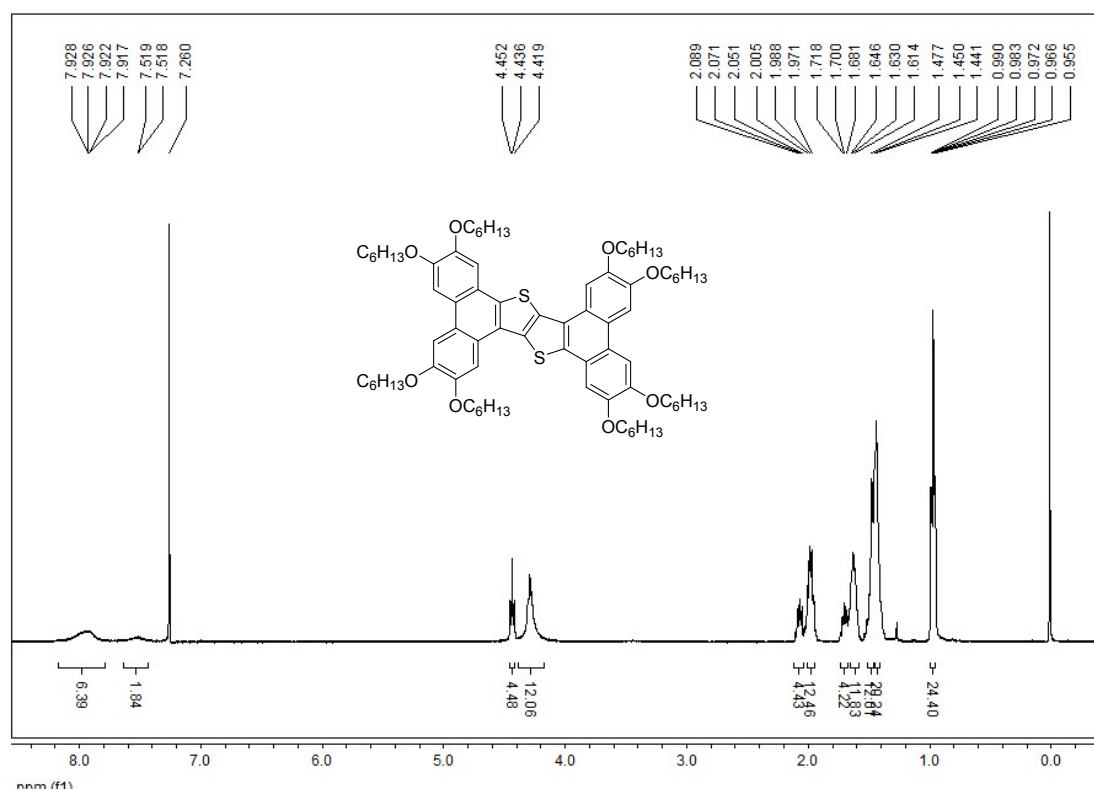

Figure S26.  $^1\text{H}$  NMR ( $\text{CDCl}_3$ , 400 MHz) spectrum of M2



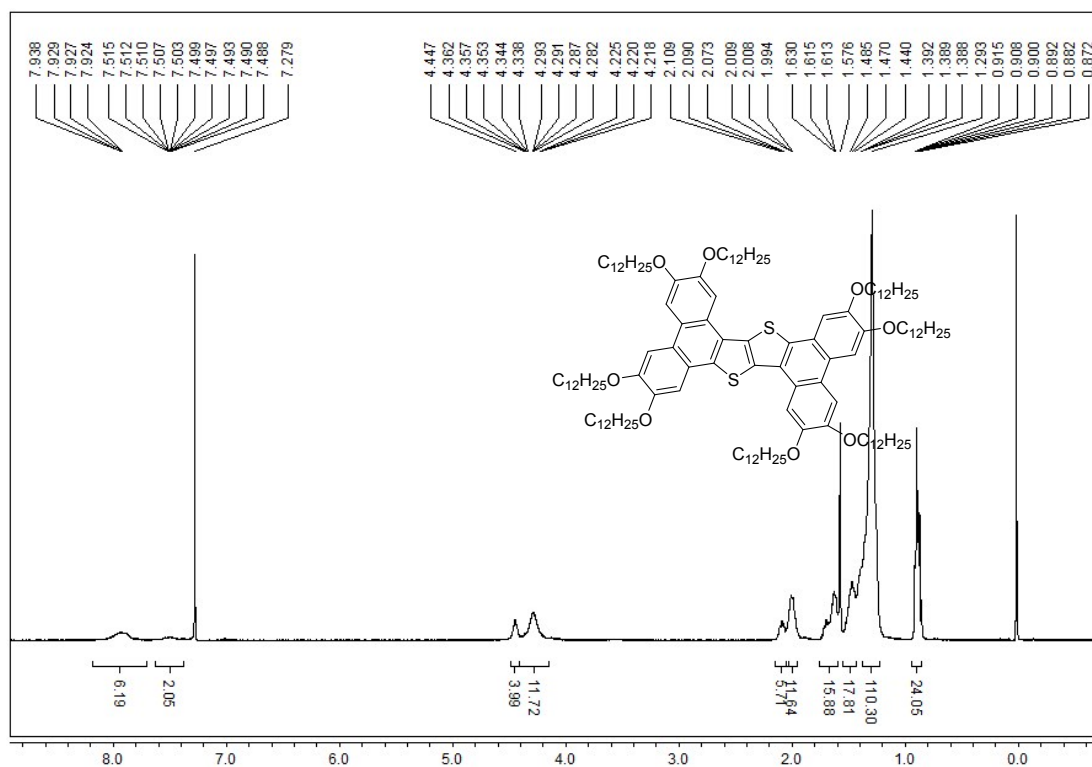

Figure S29.  $^1\text{H}$  NMR ( $\text{CDCl}_3$ , 400 MHz) spectrum of M5

## 8. HRMS

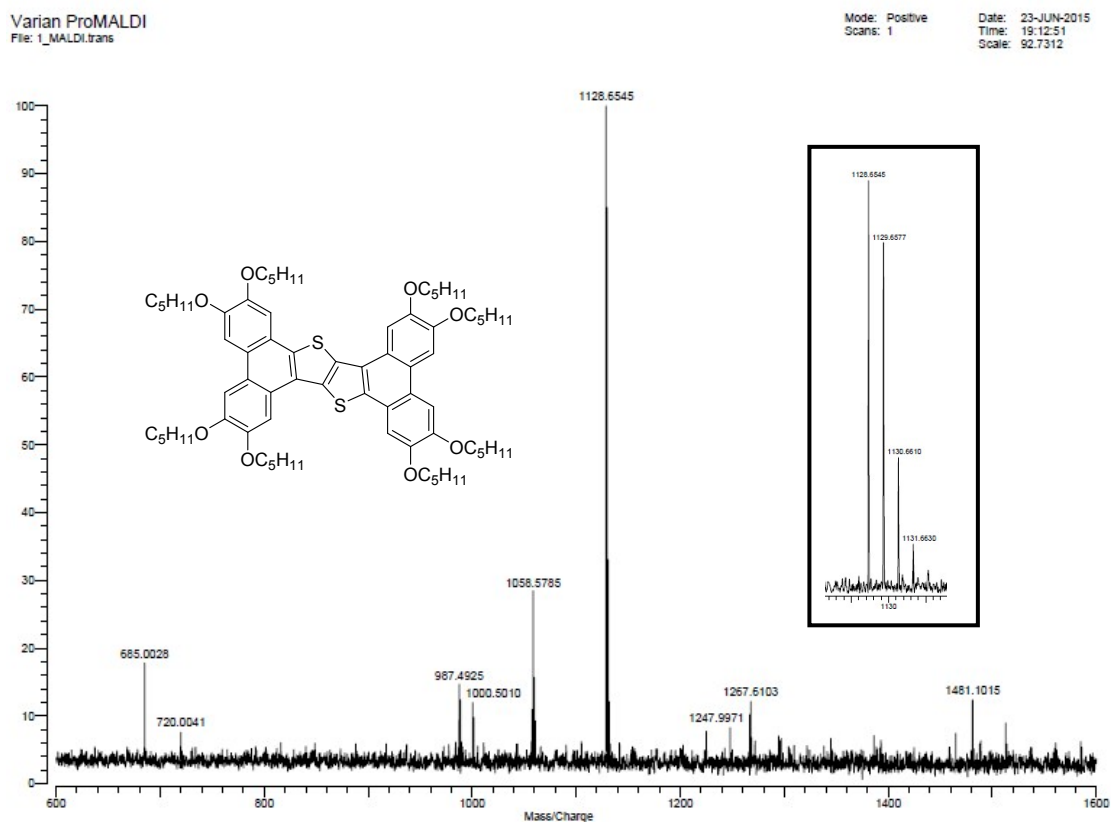

Figure S30. HRMS  $m/z$  (ESI) spectrum of M1

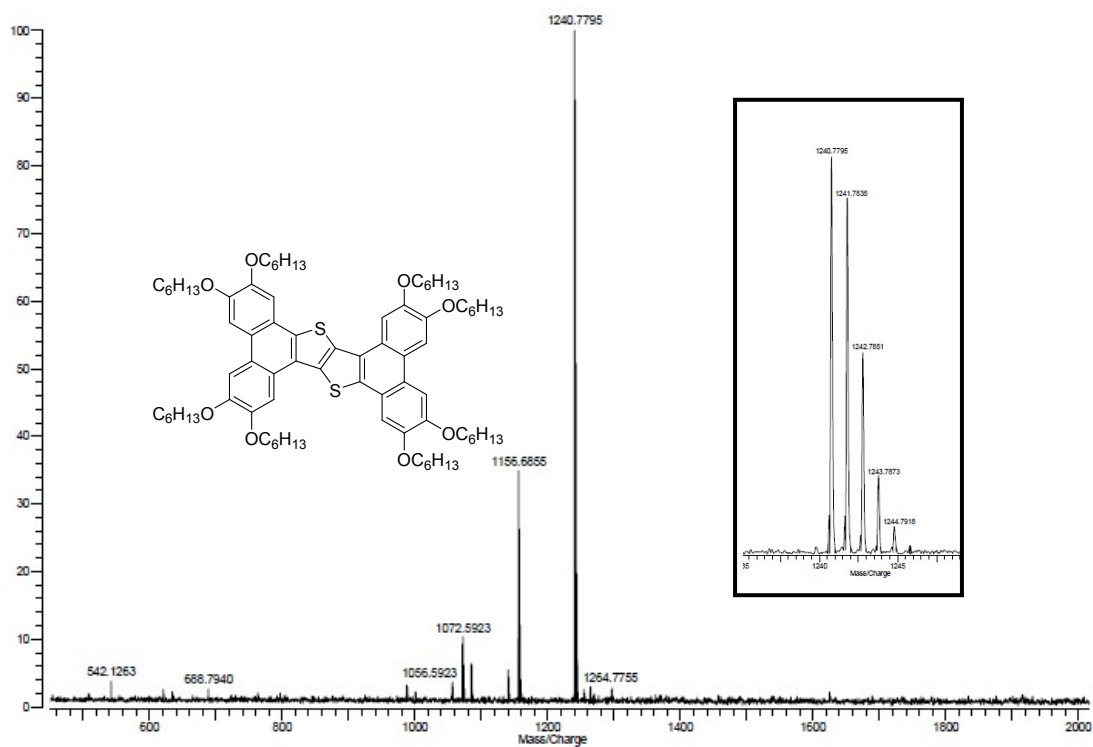

**Figure S31.** HRMS m/z (ESI) spectrum of **M2**

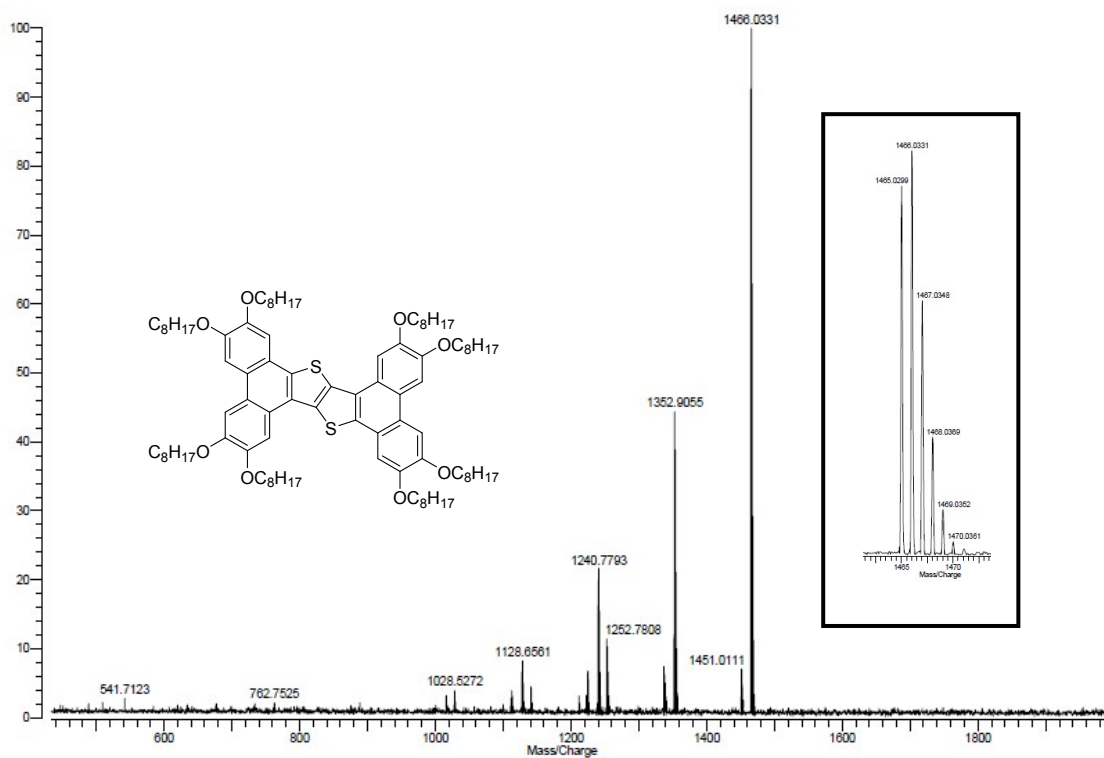

**Figure S32.** HRMS m/z (ESI) spectrum of **M3**

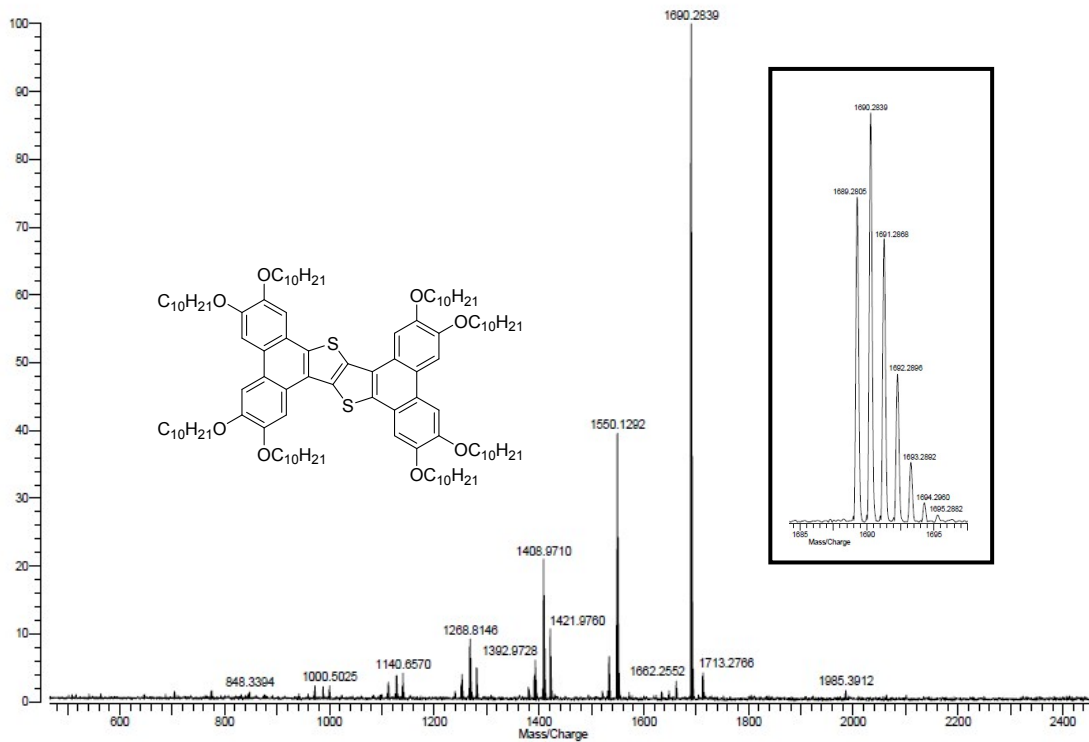

**Figure S33.** HRMS m/z (ESI) spectrum of **M4**

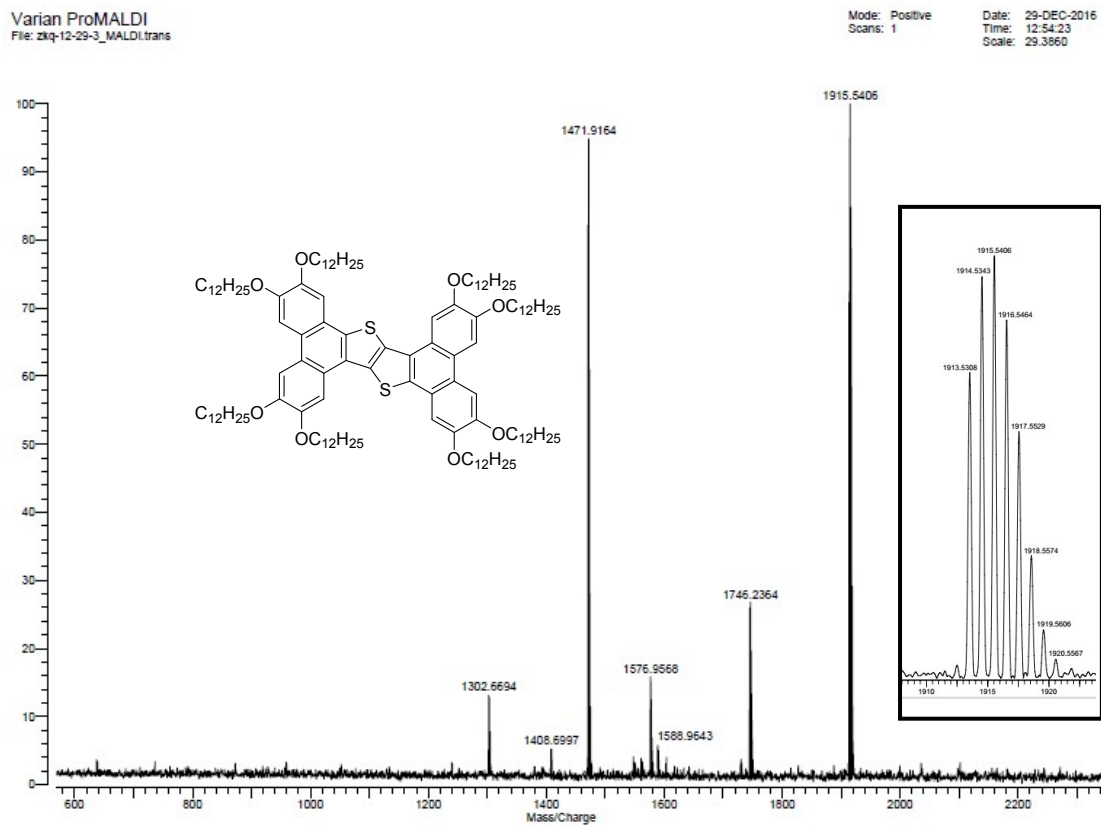

**Figure S34.** HRMS m/z (ESI) spectrum of **M5**
